# Supplementary material for: Genomewide analysis of the lateral organ boundaries domain gene family in Eucalyptus grandis reveals members that differentially impact secondary growth
Source: PubMed Central journal article supplement (PMC5785364; doi:10.1111/pbi.12754), 2017-07-25
Supplement: PBI-16-124-s001.pdf [file PBI-16-124-s001.pdf]

## Supporting information

**Genome-wide analysis of the lateral organ boundaries domain (LBD) gene family in *Eucalyptus grandis* reveals members that differentially impact secondary growth**

**Qiang Lu, Fenjuan Shao, Colleen Macmillan, Iain W. Wilson, Karen van der Merwe, Steven G. Hussey, Alexander A. Myburg, Xiaomei Dong, Deyou Qiu**

**Figure S1-S5**

**Table S1-S11**

**Figure S1** Conserved domains of EgLBD protein family. (a) Sequence alignment of EgLBD proteins by DNAMAN. (b) The CX<sub>2</sub>CX<sub>6</sub>CX<sub>3</sub>C zinc finger-like **motif** logos and the LX<sub>6</sub>LX<sub>3</sub>LX<sub>6</sub>L leucine zipper-like **motif** logos.

**Figure S2** The chromosomal localization of the *LBD* gene family in *Eucalyptus grandis*. The scale bar represents 8.0 Mb chromosomal distance, the chromosome number (Chrom01-Chrom11) is indicated at the top of each chromosome, sister paralogous pairs are connected by dotted lines.

**Figure S3** Subcellular localization of EgLBD22, EgLBD29 and EgLBD37 proteins. The photographs were taken under dark-field illumination for green fluorescence localization (green fluorescent), cells of tobacco seedlings expressing *EgLBD22/29/37*-GFP were stained with DAPI (5 ug/ml) to show the nuclear localization (DAPI stains nucleus, blue fluorescent), under bright-field illumination to examine cell morphology (bright-field), and under merged-field illumination (merged). From top to bottom line is *EgLBD22*, *EgLBD29*, *EgLBD37* and *pCAMBIA1302-GFP* (the positive control) respectively. The bar was 92 μm.

**Figure S4** Gel electrophoresis analysis for the presence of the transgene in *EgLBD22-oe*, *EgLBD29-oe* and *EgLBD37-oe* plants. (a) Gel electrophoresis result for *EgLBD22-oe* line 1, 2, 3, 4, 5, 6, 7, 8, 9, 10, 11, 12, 13, 14, 15, 16, 17, 18, 21 and CK (WT-84k). (b) Gel electrophoresis result for *EgLBD29-oe* line 1, 2, 4, 6, 7, 9, 10, 11, 25, 28, 34, 37, 40, 42, 45, 47 and CK (WT-84k). (c) Gel electrophoresis result for *EgLBD37-oe* line 1, 2, 3, 4, 5, 6, 7, 8, 10, 11, 12, 13, 14, 15, 16, 17 and CK (WT-84k).

**Figure S5** Validation for the expression of the transgene in *EgLBD22-oe*, *EgLBD29-oe* and *EgLBD37-oe* plants by qRT-PCR. (a) qRT-PCR result for *EgLBD22-oe* line 1, 3, 4, 6, 7, 8, 11, 12, 15, 17, 18, 21 and CK (WT-84k). (b) qRT-PCR result for *EgLBD29-oe* line 1, 2, 4, 5, 6, 7, 9, 10, 11, 13, 25, 45 and CK (WT-84k). (c) qRT-PCR result for *EgLBD37-oe* line 1, 2, 3, 4, 5, 6, 7, 8, 10, 11, 12, 13 and CK (WT-84k).

**Table S1** All the primers used in this study.

**Table S2** The coding sequences of *LBD* genes in *Eucalyptus grandis*.

**Table S3** The information of *LBD* gene family in *Eucalyptus grandis*.

**Table S4** Conserved motifs predicted by MEME program in EgLBD proteins.

**Table S5** Protein-protein interaction prediction for possible functional protein association networks of EgLBD22.

**Table S6** Protein-protein interaction prediction for possible functional protein association networks of EgLBD29.

**Table S7** Protein-protein interaction prediction for possible functional protein association networks of EgLBD37.

**Table S8** The differentially expressed genes between *EgLBD22-oe* and WT-84k plants.

**Table S9** The differentially expressed genes between *EgLBD29-oe* and WT-84k plants.

**Table S10** The differentially expressed genes between *EgLBD37-oe* and WT-84k plants.

**Table S11** The information of eight key differentially expressed genes in *EgLBD22-oe*, *EgLBD29-oe* and *EgLBD37-oe* plants.

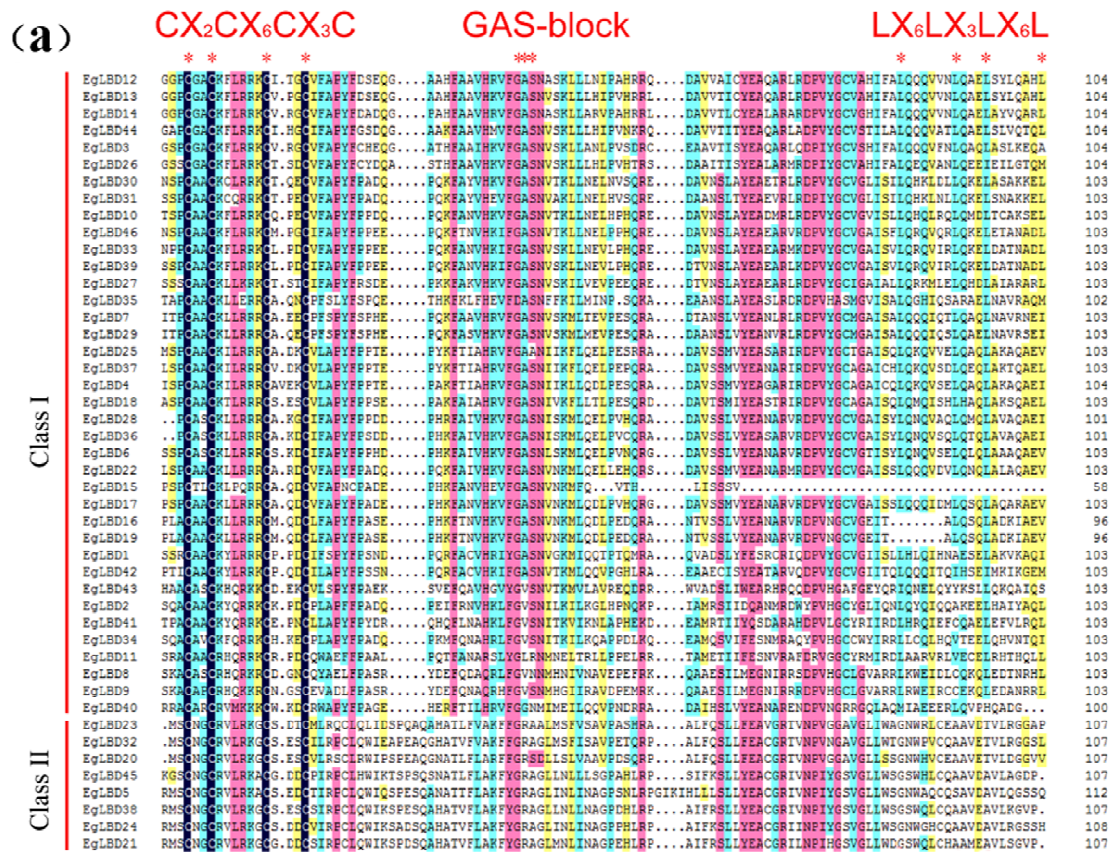

**Figure S1.** Conserved domains of EgLBD protein family. (a) Sequence alignment of EgLBD proteins by DNAMAN. (b) The CX<sub>2</sub>CX<sub>6</sub>CX<sub>3</sub>C zinc finger-like motif logos and the LX<sub>6</sub>LX<sub>3</sub>LX<sub>6</sub>L leucine zipper-like motifs logos.

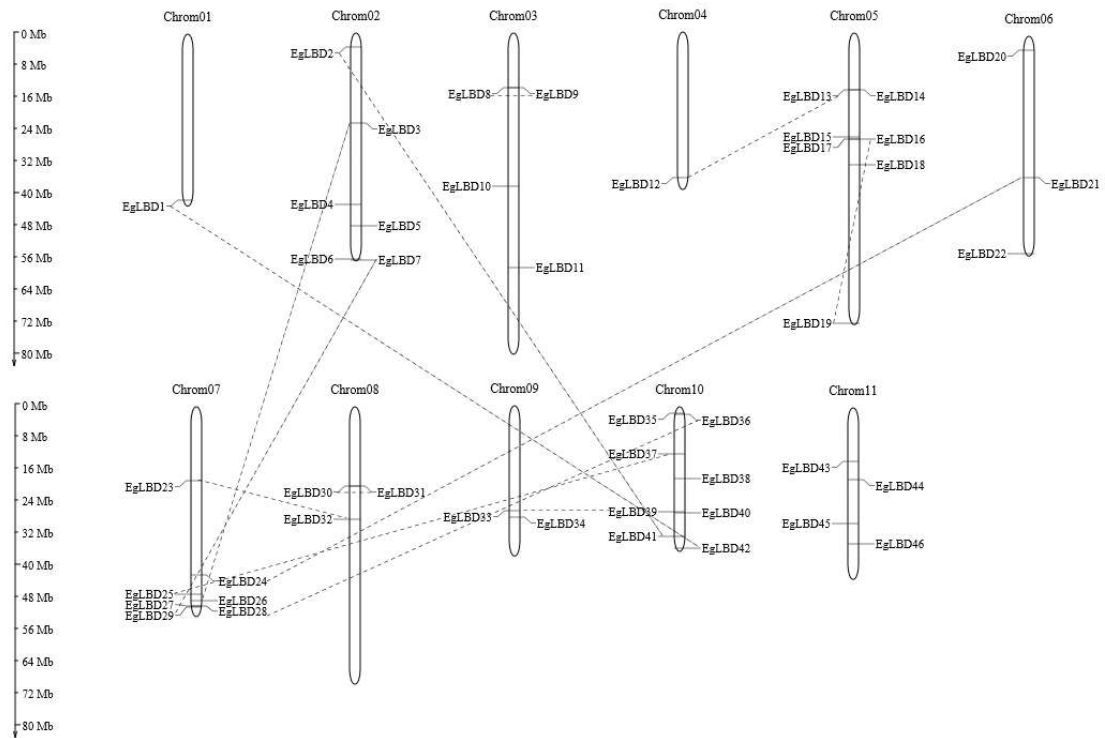

**Figure S2** The chromosomal localization of the *LBD* gene family in *Eucalyptus grandis*. The scale bar represents 8.0 Mb chromosomal distance, the chromosome number (Chrom01-Chrom11) is indicated at the top of each chromosome, sister paralogous pairs are connected by dotted lines.

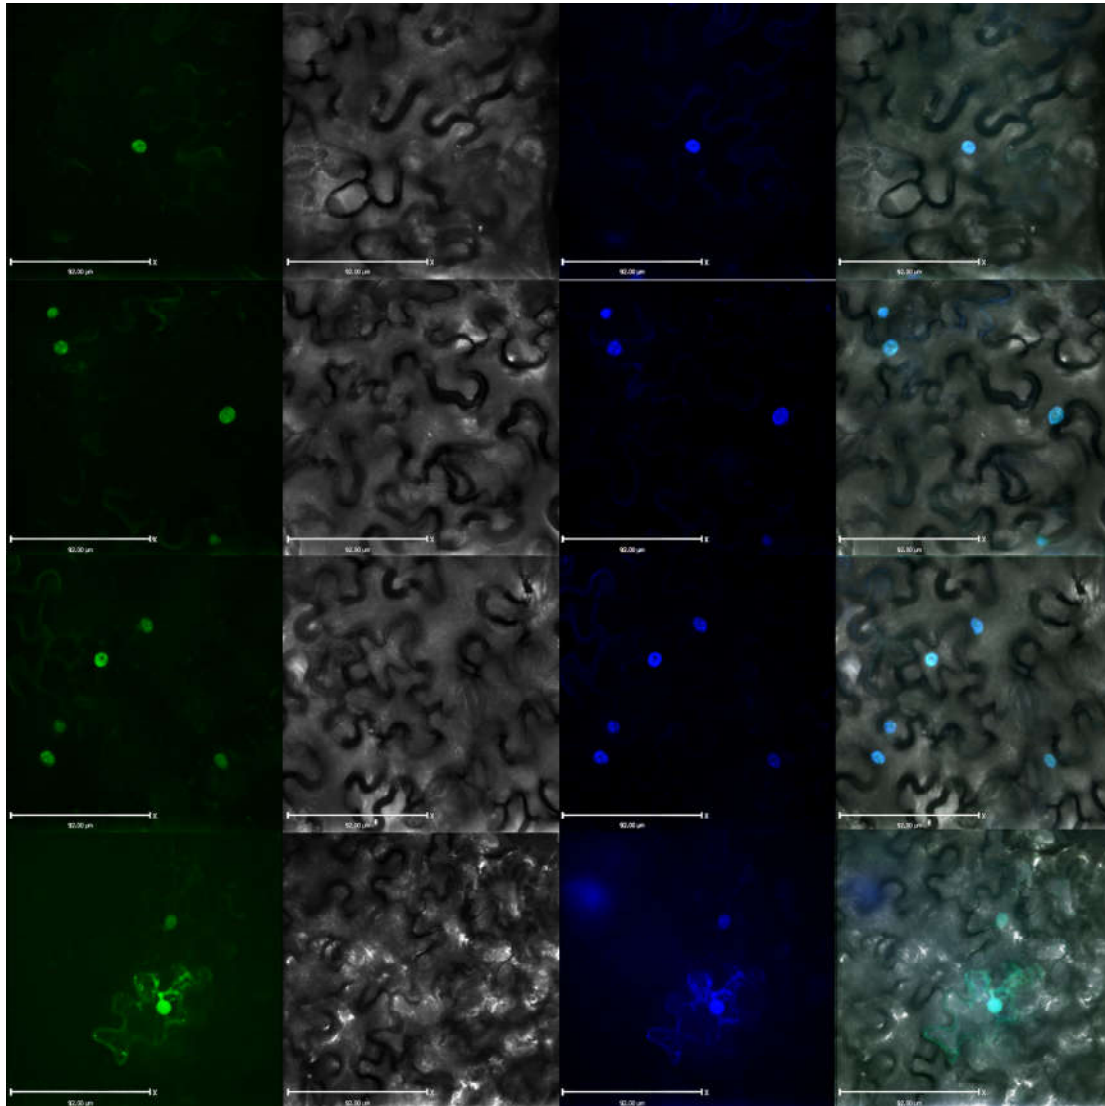

**Figure S3.** Subcellular localization of EgLBD22, EgLBD29 and EgLBD37 proteins. The photographs were taken under dark-field illumination for green fluorescence localization (green fluorescent), cells of tobacco seedlings expressing *EgLBD22/29/37*-GFP were stained with DAPI (5 ug/ml) to show the nuclear localization (DAPI stains nucleus, blue fluorescent), under bright-field illumination to examine cell morphology (bright-field), and under merged-field illumination (merged). From top to bottom line is the signal of proteins encoded by *EgLBD22*, *EgLBD29*, *EgLBD37* and *pCAMBIA1302-GFP* (the positive control) respectively. The bar was 92 µm.



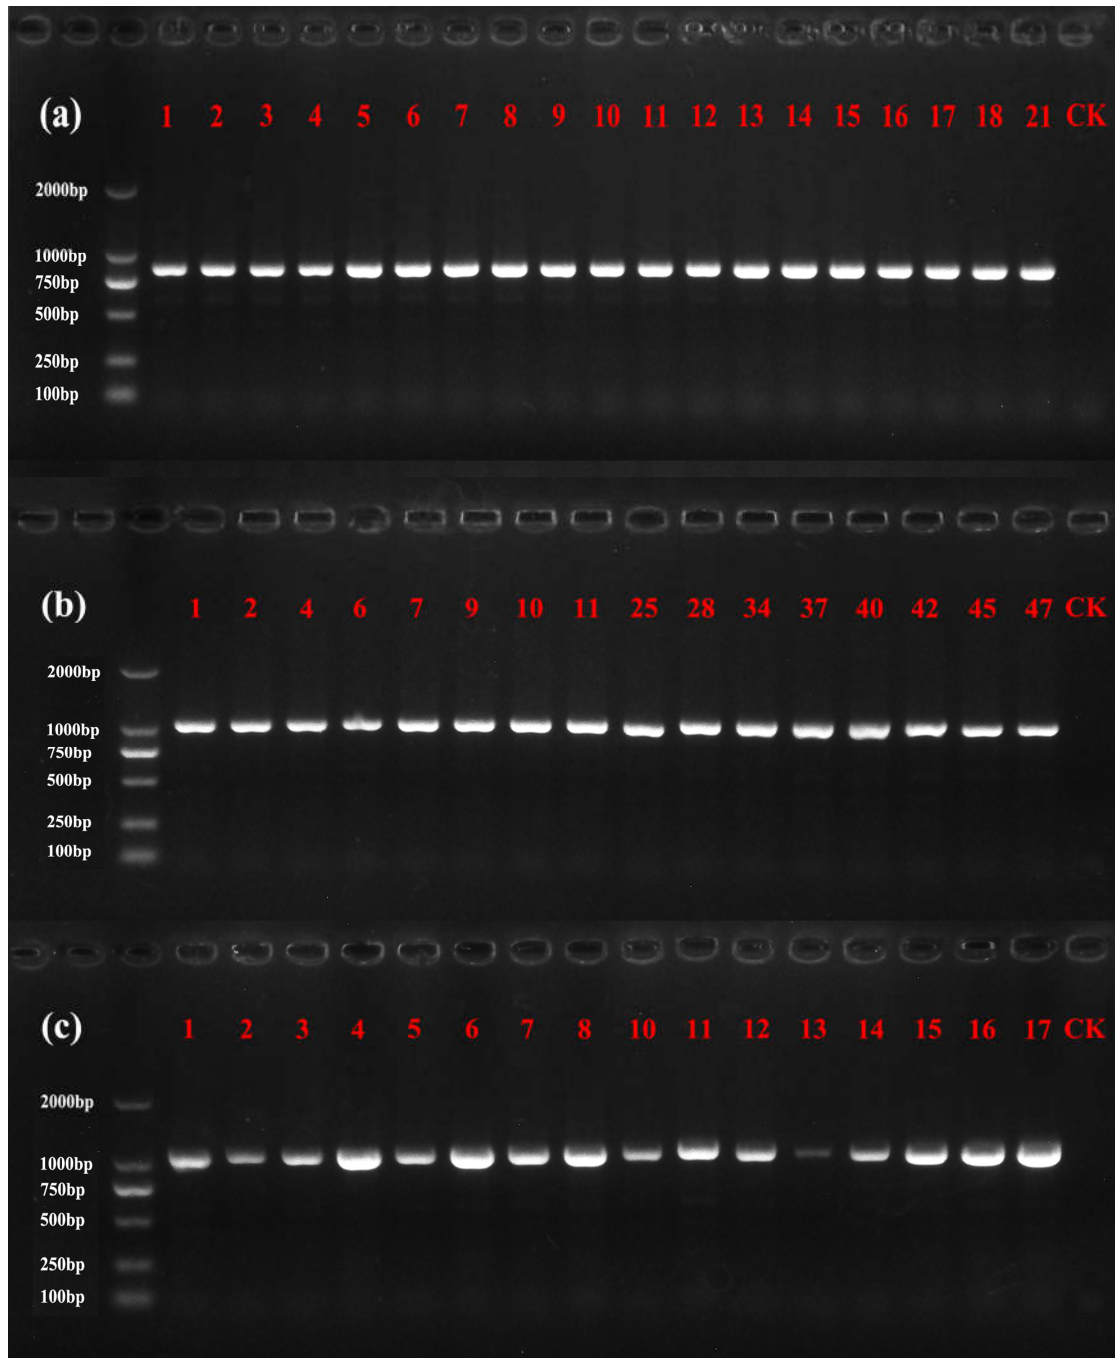

**Figure S4** Gel electrophoresis analysis for the presence of the transgene in *EgLBD22-oe*, *EgLBD29-oe* and *EgLBD37-oe* plants. (a) Gel electrophoresis result for *EgLBD22-oe* line 1, 2, 3, 4, 5, 6, 7, 8, 9, 10, 11, 12, 13, 14, 15, 16, 17, 18, 21 and CK (WT-84k). (b) Gel electrophoresis result for *EgLBD29-oe* line 1, 2, 4, 6, 7, 9, 10, 11, 25, 28, 34, 37, 40, 42, 45, 47 and CK (WT-84k). (c) Gel electrophoresis result for *EgLBD37-oe* line 1, 2, 3, 4, 5, 6, 7, 8, 10, 11, 12, 13, 14, 15, 16, 17 and CK (WT-84k).

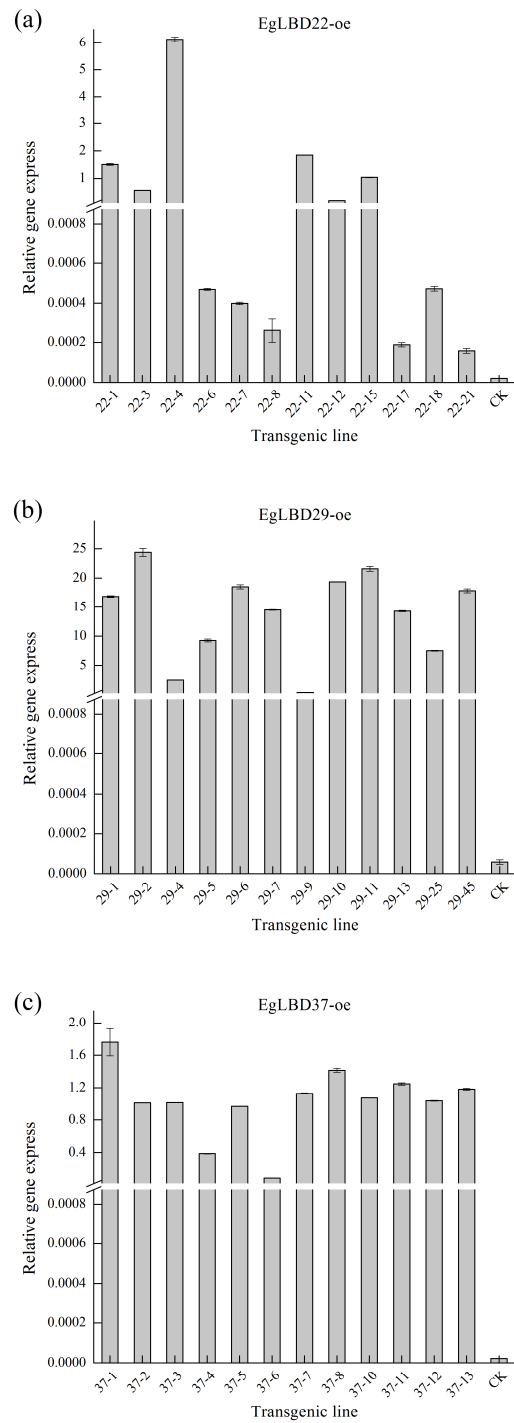

**Figure S5** Validation for the expression of the transgene in *EgLBD22-oe*, *EgLBD29-oe* and *EgLBD37-oe* plants by qRT-PCR. (a) qRT-PCR result for *EgLBD22-oe* line 1, 3, 4, 6, 7, 8, 11, 12, 15, 17, 18, 21 and CK (WT-84k). (b) qRT-PCR result for *EgLBD29-oe* line 1, 2, 4, 5, 6, 7, 9, 10, 11, 13, 25, 45 and CK (WT-84k). (c) qRT-PCR result for *EgLBD37-oe* line 1, 2, 3, 4, 5, 6, 7, 8, 10, 11, 12, 13 and CK (WT-84k).



**Table S1** All the primers used in this study.

| <b>Primers used in</b> | <b>Gene Name</b>          | <b>Primer Sequence (5'...3')</b> |                        |
|------------------------|---------------------------|----------------------------------|------------------------|
| <b>qRT-PCR</b>         | EgLBD1-F                  | TCTGATGCTAATCGGGAACC             |                        |
|                        | EgLBD1-R                  | GAAGAGCCTATCTGATGCTGC            |                        |
|                        | <b>analysis for</b>       | EgLBD2-F                         | CTAGCTCCTTTCTTCCCGGC   |
|                        |                           | EgLBD2-R                         | GGTACCAATCGCGCATGTTC   |
|                        | <b>tissue-specific</b>    | EgLBD3-F                         | TGAACGCAATGCCTTACTATGA |
|                        |                           | EgLBD3-R                         | CCGTCCCGGAAACTCCA      |
|                        | <b>expression of</b>      | EgLBD4-F                         | GAGCCCGCCAAGTTCACTAT   |
|                        |                           | EgLBD4-R                         | TCGCTCACTTGCTTCTGGAG   |
|                        | <b><i>EgLBD</i> genes</b> | EgLBD5-F                         | TCTACGAGGAGACGAGCCA    |
|                        |                           | EgLBD5-R                         | CCCAGGTTTGCCAGTGAA     |
|                        | <b>and their</b>          | EgLBD6-F                         | ACCCACGACCCTCATAAGT    |
|                        |                           | EgLBD6-R                         | TCACCGCATCTCCTCTCTGA   |
|                        | <b>response to GA</b>     | EgLBD7-F                         | GAAGAGTGCCCTTTCTCCCC   |
|                        |                           | EgLBD7-R                         | TGTTGCAAAGCCGAGATTGC   |
|                        | <b>and IAA</b>            | EgLBD8-F                         | CGACCACTACTCTGCTCGAC   |
|                        |                           | EgLBD8-R                         | TCATTCCATGGCCCTGTCAC   |
|                        | <b>treatment</b>          | EgLBD9-F                         | GAGGGTAACATCAGGAGACG   |
|                        |                           | EgLBD9-R                         | CAAAGACAGGCGACGATT     |
|                        |                           | EgLBD10-F                        | CACCAGTTCTTTCCCCGTGA   |
|                        |                           | EgLBD10-R                        | GAGAAGGCTTGCGTCGTAGT   |
|                        |                           | EgLBD11-F                        | CGGAGCGTCGACTTCATCAT   |
| EgLBD11-R              |                           | GCATGCCAAGTTGAGGATCG             |                        |
| EgLBD12-F              |                           | TGCTCATTACCAACCACCAT             |                        |
| EgLBD12-R              |                           | GTGAAGTATCAGGCATTCGG             |                        |
| EgLBD13-F              |                           | TATTCGCGCCCTACTTCGAC             |                        |
| EgLBD13-R              |                           | CGCCTCGTAGCATATGGTGA             |                        |
| EgLBD14-F              |                           | CAGCACTTCCCTCTACAGCC             |                        |
| EgLBD14-R              |                           | ATGTTTGGCAGAGTCGGGT              |                        |
| EgLBD15-F              |                           | GGCTGGAAGCAGGGGATG               |                        |
| EgLBD15-R              |                           | CGTTGGCGAACTTGTGGG               |                        |
| EgLBD16-F              |                           | GAGCCCCACAAGTTCACCAA             |                        |
| EgLBD16-R              |                           | CCAGGCTACTCACGGTGTTT             |                        |
| EgLBD17-F              |                           | ATGAAGGAAAGCGGTGGGAG             |                        |
| EgLBD17-R              |                           | CCGGGAAATATGGGGCAAAC             |                        |
| EgLBD18-F              |                           | TGACACTTCCCGAATCGCAA             |                        |
| EgLBD18-R              |                           | CGTGAGATTAGCCCGTTGGA             |                        |
| EgLBD19-F              |                           | GAGCCCCACAAGTTCACCAA             |                        |
| EgLBD19-R              | CCAGGCTACTCACGGTGTTT      |                                  |                        |
| EgLBD20-F              | CAAGAGGAGCCACGTGACAA      |                                  |                        |
| EgLBD20-R              | GGTTCAGGAGCTTCGTCTCT      |                                  |                        |
| EgLBD21-F              | CGAGCTGACGCTAGGGTTCAA     |                                  |                        |

|           |                       |
|-----------|-----------------------|
| EgLBD21-R | CATGCTGCACGCTTCGTCTCT |
| EgLBD22-F | GCCAGCAATGTCAACAAGAT  |
| EgLBD22-R | ATACAGGGTCTCGCATCCTT  |
| EgLBD23-F | GACCACTTTAGGCCTCGGAG  |
| EgLBD23-R | AGACATCAGGGACAGGTCGA  |
| EgLBD24-F | GCCCTGCCTACAATGGATCA  |
| EgLBD24-R | TGATGAGGTTGATGAGGCCG  |
| EgLBD25-F | GCAGTGCCAGAACACCAA    |
| EgLBD25-R | CCCAAGAAGGGATGAGGT    |
| EgLBD26-F | TTGGCTCTTCATGTGGTGCA  |
| EgLBD26-R | GGCCTGGTCGTAGCAGAAAT  |
| EgLBD27-F | ATGAGGGCGATGCGAATGAA  |
| EgLBD27-R | TCGACGTGCACTTCCTCTTC  |
| EgLBD28-F | AGCCTTGTGTACGAAGCCAA  |
| EgLBD28-R | CTTGTCGTCTGAGCTGTCCA  |
| EgLBD29-F | TGAGAGCCAAAGAGCTGACG  |
| EgLBD29-R | GGGACTGATGATGCCTGCTT  |
| EgLBD30-F | GACAGCAGCAACAGCAACAA  |
| EgLBD30-R | CGGCGGTGGAGAGATTACAT  |
| EgLBD31-F | TCGCACAAATGGTTCTGACT  |
| EgLBD31-R | CTTGCTCGTGGTATGGGTT   |
| EgLBD32-F | AGGGTCTGAGGAAGGGCT    |
| EgLBD32-R | AACTTGCGCACGAAGACG    |
| EgLBD33-F | TCAACTCTCTCGCCTATGAGG |
| EgLBD33-R | GCTCCTTCTGTAGCCTGATGA |
| EgLBD34-F | GTCCCGACCCGACAATCTTT  |
| EgLBD34-R | TGAACACGTCCGCACCATAA  |
| EgLBD35-F | TGCAAGCCACATTCAGAGT   |
| EgLBD35-R | AGCAGCGATGTTAGGCAGAA  |
| EgLBD36-F | GGACTGCATCTTCGCTCCTT  |
| EgLBD36-R | TCTGACAAACCGGAAGCTCC  |
| EgLBD37-F | CCCACCGAGCCTTACAAGTT  |
| EgLBD37-R | CTCGTACACCATGCTGCTCA  |
| EgLBD38-F | GATGAGCTGTAACGGGTGCA  |
| EgLBD38-R | AGAACTTGGCGAGGAAGACG  |
| EgLBD39-F | GGAGAAAGTGCCTGCCTGAT  |
| EgLBD39-R | TCACGTTGCTAGCCCCAAAT  |
| EgLBD40-F | GAACGCTTACCATCCTCCA   |
| EgLBD40-R | TCAGCAATCATCTGGGCGAG  |
| EgLBD41-F | CCCGTCGGACTTTCAGATCA  |
| EgLBD41-R | TCCTGTCTGCTGCAATGTCC  |
| EgLBD42-F | CTGTCTATGGATGCGTTGGA  |
| EgLBD42-R | ATGGAAGGTGTTGTGGGTGT  |

|                                                                                                                        |                                    |                                                              |
|------------------------------------------------------------------------------------------------------------------------|------------------------------------|--------------------------------------------------------------|
|                                                                                                                        | EgLBD43-F                          | TGCAAGGGGAGATCAGCAAG                                         |
|                                                                                                                        | EgLBD43-R                          | CGGTATTCATGCTCGTCCCA                                         |
|                                                                                                                        | EgLBD44-F                          | CGTCAACAAGAGGCAGGATG                                         |
|                                                                                                                        | EgLBD44-R                          | GCAATGCAAGGATGGTTCGAT                                        |
|                                                                                                                        | EgLBD45-F                          | GAGGTTGGAGCCGAGAAGAG                                         |
|                                                                                                                        | EgLBD45-R                          | GAACGTCCAGACCAGAGCTC                                         |
|                                                                                                                        | EgLBD46-F                          | CCAATGCCGATCTCATCCGA                                         |
|                                                                                                                        | EgLBD46-R                          | CCTCCCAACACCACCAAAC                                          |
|                                                                                                                        | PP2A3--F                           | CAGCGGCAAACAACCTGAAGCG                                       |
|                                                                                                                        | PP2A3--R                           | ATTATGTGCTGCATTGCCAGTC                                       |
| <b>Primers used in subcellular localization analysis</b>                                                               | EgLBD22-GFP-F                      | AGTTCATTTCATTTGGAGAGAACACGGGGGAC<br>TCTTGACCATGAAAGAGAGTGGGA |
|                                                                                                                        | EgLBD22-GFP-R                      | TTGGGACAACCTCCAGTGAAAAGTTCTTCTCCT<br>TTACTAGTTGACCACAAAGAGTC |
|                                                                                                                        | EgLBD29-GFP-F                      | AGTTCATTTCATTTGGAGAGAACACGGGGGAC<br>TCTTGACCATGTCCAGAGAAAGT  |
|                                                                                                                        | EgLBD29-GFP-R                      | TTGGGACAACCTCCAGTGAAAAGTTCTTCTCCT<br>TTACTAGTACCAAATAAGAGAC  |
|                                                                                                                        | EgLBD37-GFP-F                      | CATGCCATGGAAATGGAATACAAGGCGAGAA<br>C                         |
|                                                                                                                        | EgLBD37-GFP-R                      | CTAGACTAGTCGTCCAGTAAATCGATTCCCAG                             |
| <b>Primers used in constructing the overexpression vector</b>                                                          | 121-EgLBD22-F                      | GCTCTAGAATGAAAGAGAGTGGAAGAAAAC                               |
|                                                                                                                        | 121-EgLBD22-R                      | TCCCCCGGGTCATGACCACAAAGAGTCCTCG                              |
|                                                                                                                        | 121-EgLBD29-F                      | GCTCTAGAATGTCCAGAGAAAGTAGGGAGA                               |
|                                                                                                                        | 121-EgLBD29-R                      | TCCCCCGGGTTAACCAAATAAGAGACATTC                               |
|                                                                                                                        | 121-EgLBD37-F                      | GCTCTAGAATGGAAATGGAATACAAGGCGA                               |
|                                                                                                                        | 121-EgLBD37-R                      | TCCCCCGGGTCACGTCCAGTAAATCGATTCC                              |
| <b>Primers used in analysis for the presence of the transgene</b>                                                      | EgLBD22-F                          | GCCATCATTGCGATAAAGGAAA                                       |
|                                                                                                                        | EgLBD22-R                          | ATCCAGACTGAATGCCACAGG                                        |
|                                                                                                                        | EgLBD29-F                          | GCCATCATTGCGATAAAGGAAA                                       |
|                                                                                                                        | EgLBD29-R                          | ATCCAGACTGAATGCCACAGG                                        |
|                                                                                                                        | EgLBD37-F                          | GCCATCATTGCGATAAAGGAAA                                       |
|                                                                                                                        | EgLBD37-R                          | ATCCAGACTGAATGCCACAGG                                        |
| <b>Primers used in validation of the RNA-seq results for the expression of selected genes in the transgenic plants</b> | auxin efflux carrier component 6-F | TCCCCATCACGGTGTTAGTTAA                                       |
|                                                                                                                        | auxin efflux carrier component 6-R | ACATATGGCTCAAAATCAGGGC                                       |
|                                                                                                                        | expansin gene (c60809_g2)-F        | TGATGGTAGGACTGTGACTAGC                                       |
|                                                                                                                        | expansin gene (c60809_g2)-R        | CTTTCCTACCCTACCCCTTCTC                                       |

|                                                                                               |                                                              |                         |
|-----------------------------------------------------------------------------------------------|--------------------------------------------------------------|-------------------------|
|                                                                                               | ERF023-F                                                     | TTGGAATCAGTACCGAATGTGC  |
|                                                                                               | ERF023-R                                                     | TGGCAGCGTATTGTCTTAAAGG  |
|                                                                                               | ethylene-responsive element-binding (EREB) family protein -F | AATGTTCCAAGCCATACACGAG  |
|                                                                                               | ethylene-responsive element-binding (EREB) family protein -R | ACCAAAGTCTCCAAGCACTCTA  |
|                                                                                               | expansin (c60754_g1)-F                                       | ATGAGATGTGATGATGACCCCA  |
|                                                                                               | expansin (c60754_g1)-R                                       | GCACCCTTCTAAAAGCTACAGG  |
|                                                                                               | gibberellin-regulated protein 5-F                            | ACCAAGATGTAATTACCGCTGC  |
|                                                                                               | gibberellin-regulated protein 5-R                            | CCTTGTTGCCATAAGTACCAGG  |
|                                                                                               | expansin-B3-F                                                | GGTCATTAGTGGATGTGAAGCC  |
|                                                                                               | expansin-B3-R                                                | AAAGTGAGTGTTGCCATTGGAA  |
|                                                                                               | MYB Family APL-like-F                                        | TCACAGAACTTGAATGACGACG  |
|                                                                                               | MYB Family APL-like-R                                        | CCTGTGTCTGTCCCTCTCTATC  |
|                                                                                               | PtActin-F                                                    | AACTGTAATGGTCCTCCCTCCG  |
|                                                                                               | PtActin-R                                                    | GCATCATCACAATCACTCTCCGA |
| <b>Primers used in analysis for the expression of selected genes in the transgenic plants</b> | EgLBD22-F                                                    | GCCAGCAATGTCAACAAGAT    |
|                                                                                               | EgLBD22-R                                                    | ATACAGGGTCTCGCATCCTT    |
|                                                                                               | EgLBD29-F                                                    | TGAGAGCAAAGAGCTGACG     |
|                                                                                               | EgLBD29-R                                                    | GGGACTGATGATGCCTGCTT    |
|                                                                                               | EgLBD37-F                                                    | CCCACCGAGCCTTACAAGTT    |
|                                                                                               | EgLBD37-R                                                    | CTCGTACACCATGCTGCTCA    |
|                                                                                               | PtActin-F                                                    | AACTGTAATGGTCCTCCCTCCG  |
|                                                                                               | PtActin-R                                                    | GCATCATCACAATCACTCTCCGA |

**Table S2** The coding sequences of *LBD* genes in *Eucalyptus grandis*.

| GenBank accession number | Euc ID         | Gene name     | Coding Sequence                                                                                                                                                                                                                                                                                                                                                                                                                                                                                                                                                                                                                                    |
|--------------------------|----------------|---------------|----------------------------------------------------------------------------------------------------------------------------------------------------------------------------------------------------------------------------------------------------------------------------------------------------------------------------------------------------------------------------------------------------------------------------------------------------------------------------------------------------------------------------------------------------------------------------------------------------------------------------------------------------|
| XP_010025<br>110         | Eucgr.A02814.1 | <i>EgLBD1</i> | ATGTCAACCATTTTCATCTCGATGTGCAG<br>CTTGCAAATATTTGAGAAGAAGATGCCC<br>TCCAGATTGCATTTTCTCTCCTTATTTCC<br>CATCCAATGACCCCAAAGATTTGCTTG<br>TGTTACAGGATCTATGGTGCGAGCAAT<br>GTTGGCAAATGATCCAGCAAACCTCCG<br>ACCCAAATGAGAGCTCAAGTTGCGGATT<br>CGCTGTACTTCGAGTCACGATGCCGGAT<br>TCAAGACCCGGTGTACGGATGTGTCCG<br>GATCATCTCCCTGCTGCATTTACAAATAC<br>ATAATGCCGAAAGCGAATTGGCTAAAGT<br>AAAAGCACAAATCGCGTTTCTTAATTCT<br>GATGCTAATCGGGAACCGAGTTTCCGAC<br>CACAGCTCGAGGGTGCTTCCAATGTTAA<br>CAATTTATGGAGTGCACAAAGCAGTGTT<br>GAGCAGCATCAGATAGGCTCTTCTACAA<br>CTCATGGTCCTTTAGCGTTCATGTAG                                                                                          |
| XP_010028<br>622         | Eucgr.B00397.1 | <i>EgLBD2</i> | ATGACCCTGAAGGGTGGCGCCAGCCAG<br>GCATGCGCGGCGTGCAAGTACCAGAGG<br>AGGAAGTGCAAACCAGACTGCCCTCTA<br>GCTCCTTTCTTCCCGGCCGACCAGCCGG<br>AGATCTTCCGGAACGTGCACAAGTTGTT<br>TGCGGTGAGCAACATCCTAAAGATATTG<br>AAAGGCCTGCATCCTAACCAGAAGCCC<br>ATCGCCATGAGATCCATCATCGACCAAG<br>CGAACATGCGCGATTGGTACCCGGTGCA<br>CGGCTGCTACGGCCTCATCCAGAACCTG<br>CAGTACCAAATACAGCAGGCCAAGGAA<br>GAGCTCCATGCCATTTACGCGCAGCTAG<br>AGATGTACAGGCAACAGAACCAGGTCT<br>CTCCGGTCCCTGAAGACGTGCCTTCTCA<br>GCTGGAATTGGGCATGGCCCCACCAA<br>CGGCGCGCTTCCCCTGTTCCACCAAACG<br>CAGCAGCAGTGCAGCGCTGCGGCCGCC<br>TTGCCCGTTCCGCAAGATCACTGCGGTA<br>ACAACGGAGGCGTAGCTGGTTACGACA<br>GCTCCAGTGATGTGGTGCCCAAGGATAA |

|                  |                |               |                                                                                                                                                                                                                                                                                                                                                                                                                                                                                                                                                                                                                                                                                                                                                                                                                                                                                                       |
|------------------|----------------|---------------|-------------------------------------------------------------------------------------------------------------------------------------------------------------------------------------------------------------------------------------------------------------------------------------------------------------------------------------------------------------------------------------------------------------------------------------------------------------------------------------------------------------------------------------------------------------------------------------------------------------------------------------------------------------------------------------------------------------------------------------------------------------------------------------------------------------------------------------------------------------------------------------------------------|
|                  |                |               | <p>TGTCGAGAATGCCTTGTGGATGCAAAT<br/> CAATACGCTAATTACAGCAACAGCAATG<br/> CAATTCAGATGGCTGCATCGCAGCCGAT<br/> GGACGTGCAGCAAGAAATAGTCCAAGA<br/> CTACGATGAACTCCAACCTTTCTTCGAC<br/> ACCATCGACGATACACAGTCTTATAAAG<br/> AGGCATGCGACTCGAGCTCGGAATCGTC<br/> ATTGAAGGATACAAGGCAATCCATCGAG<br/> CATGCTGGCAACAACGATTTGAAGAGC<br/> GCTGCCGCATGCTTCAGCCTCACCAGTG<br/> TCAACTGA</p>                                                                                                                                                                                                                                                                                                                                                                                                                                                                                                                                      |
| XP_010039<br>047 | Eucgr.B01529.1 | <i>EgLBD3</i> | <p>ATGACTGGTTCTGGTTCTCCTTGTGGCG<br/> CTTGCAAGTTCTTGAGGAGGAAATGCGT<br/> GAGAGGCTGCGTCTTTGCTCCATATTTTT<br/> GCCACGAGCAAGGTGCGACGCATTTGCG<br/> CGGCCATTCAAAAGGTCTTTGGCGCAAG<br/> CAACGTGTCAAAGCTCCTGGCAAACCT<br/> CCCCGTGAGTGATCGGTGCGAGGCCGC<br/> CGTGACCATCTCGTATGAGGCTCAGGCG<br/> CGGCTGCAGGACCCATTTATGGATGCG<br/> TCTCGCACATCTTTGCGCTCCAACAACA<br/> GGTATTCAATTTGCAAGCGCAATTGGCT<br/> TCTCTGAAGGAGCAAGCTACTCAAAGC<br/> CTTTGTGCTCCCTCTTCCACGAGAGGGA<br/> GCCTTAACGAGAAATATTCTGGAAATAA<br/> GGTCATCTCGAACCAAGCCCTTGACGTG<br/> CAAAGTTGGTTGCACATGGCAAATCCAA<br/> ATAATTTGCCTCATCAGTTCAGTTTAGAT<br/> AGCATGAGCAATGTGAACGCAATGCCTT<br/> ACTATGACAATGGGTGCGATGGATTCAAG<br/> CTCTGCAGGGAACAATTATGACAATTCA<br/> CTTGTCTAGAAAGAGAACATCTCCTTTG<br/> GGAGCTTAGAAGAGGCTTCTGGTGGTT<br/> CGATCTCTTCAATGGATATGCAAACAAG<br/> CAACAGGCAGTGGAGTTTCCGGGACGG<br/> TGATGACCTCCACTCCTTCACGTATGGG<br/> TACATTCACCATTAG</p> |
| XP_010043<br>701 | Eucgr.B02465.1 | <i>EgLBD4</i> | <p>ATGGCTGTGCAAGATATGGAGGTTTCGG<br/> ACGCGAGTGTCACGAACGGAAACGCC<br/> ACACGAGCTCCACAACCACCTCTTCTCC<br/> GCAGTCTGTCTCGCCTACTTCGTGCTCT<br/> TCTCCTCCTCCCCCTCTTCTCCGCCGA<br/> CGCCGGTCATCATAAGCCCTTGCGCGGC<br/> CTGCAAGATTCTGAGGCGAAGGTGTGC</p>                                                                                                                                                                                                                                                                                                                                                                                                                                                                                                                                                                                                                                                           |

|          |                |               |                                                                                                                                                                                                                                                                                                                                                                                                                                                                                                                                                                                                                                                                                                                                                                                                                                                                                                   |
|----------|----------------|---------------|---------------------------------------------------------------------------------------------------------------------------------------------------------------------------------------------------------------------------------------------------------------------------------------------------------------------------------------------------------------------------------------------------------------------------------------------------------------------------------------------------------------------------------------------------------------------------------------------------------------------------------------------------------------------------------------------------------------------------------------------------------------------------------------------------------------------------------------------------------------------------------------------------|
|          |                |               | <p>CGTCGAGAAGTGCGTGCTGGCGCCCTAT<br/> TTTCCTCCCACCGAGCCCGCCAAGTTCA<br/> CTATTGCCCATCGCGTCTTCGGCGCAAG<br/> CAACATCATCAAGCTCTTGCAGGACCTT<br/> CCAGAATCACAGCGAGCCGATGCGGTG<br/> AGTAGCATGGTGTATGAGGCTGGGGCGA<br/> GGATCAGGGACCCTGTCTATGGCTGCGC<br/> AGGCGCGATCTGCCAACTCCAGAAGCA<br/> AGTGAGCGAGCTCCAGGCTCAGCTGGC<br/> CAAGGCCCAAGCCGAGATCCTCACCAT<br/> GCAACACCAGCAAACCAACCTGGTGGC<br/> CTTGCTGTGCATGGAAATGGCTCAGTCG<br/> GCTTCTCAGCCGCCAGCGCAACAATTCG<br/> TCGACAATCTAATCGACACCAGTCCAAC<br/> CATCTACCAGAACAACAGTAACAACAA<br/> CATAAGCCCGTTCCTGGACGAGACCAA<br/> CGTCATGGGGTCCATGTGGGAGCCGCTT<br/> TGGACATGA</p>                                                                                                                                                                                                                                                                                       |
| KCW86326 | Eucgr.B03016.1 | <i>EgLBD5</i> | <p>ATGAGAATGAGCTGCAACGGGTGTAGA<br/> GTCCTCCGAAAGCCTGCAGCGAAGAT<br/> TGCACCATCAGGCCTTGCCTCCAGTGG<br/> TCCAATCCCCGAGTCGCAGGCCAACG<br/> CCACCACGTTCCCTCGCCAAGTTCTACGG<br/> CCGCGCCGGCCTCATCAACCTCATCAAT<br/> GCTGGCCCCTCCAACCTCCGCCAGGTA<br/> TCAAAATCCATCTACTTCTGTCGTTGCTG<br/> TACGAGGCCTGCGGGCGGATCGTCAAC<br/> CCGATCTACGGCTCGGTCGGGCTGCTCT<br/> GGTCGGGCAACTGGGCCAGTGCCAGT<br/> CGGCCGTCGATGCGGTGCTCCAGGGCTC<br/> CTCCAGTTCTTGCATCGCCTTCGCTC<br/> GACTCCACGGGGCCCCGCCTCAAGCCC<br/> TGCGACATCCGCCACGTCCGGAAGACG<br/> TCCGGCTCCGGCGGCCTCCGCAAGATCA<br/> GGACCGGACTCAGTTCAAGCGGTTCGT<br/> CATCGAATCGGGACAAGCTGGGCACGG<br/> AGCCCGAGGAGCTGTTTCGGCCGTGAAG<br/> GGAGCAAGTGGATCTACCCGGGCCCCAT<br/> CTACGAGGAGACGAGCCACGACTCACG<br/> GGCGGCGGCGAACC GGGAGAGCGCGG<br/> AGGCCGAGAGCATCTTCTCGGTGGAGA<br/> CCGTGGAGGCTTCACTGGCAAACCTGG<br/> GGAAGCGGAACCGGATGCTGAAATTCG<br/> ACTGGCCGGCGGAGGAGAGTCCGGAGA</p> |



|                  |                |               |                                                                                                                                                                                                                                                                                                                                                                                                                                                                                                                                                                                                                                                                                                                                                 |
|------------------|----------------|---------------|-------------------------------------------------------------------------------------------------------------------------------------------------------------------------------------------------------------------------------------------------------------------------------------------------------------------------------------------------------------------------------------------------------------------------------------------------------------------------------------------------------------------------------------------------------------------------------------------------------------------------------------------------------------------------------------------------------------------------------------------------|
|                  |                |               | GTCCACTCCAGTTAGAGCTGGGTCTGGG<br>CGTCAAACCGTCGTCACATCCAAGCGA<br>GCCCCACTTCGGTTCGGCATTGA                                                                                                                                                                                                                                                                                                                                                                                                                                                                                                                                                                                                                                                          |
| XP_010045<br>372 | Eucgr.B03991.1 | <i>EgLBD6</i> | ATGGGAGGATCGTCGGGATCTTCGCCAT<br>GTGCTTCCTGCAAGCTGTTGAGACGCCG<br>CTGCTCCAAGGATTGCATCTTCGCTCCAT<br>ATTTCCACCCCACGACCCTCATAAGTT<br>TGCCATTGTTCATAAGGTCTTTGGTGCC<br>AGTAATCTCAGCAAATGTTGCAGGAAC<br>TTCCGGTGAATCAGAGAGGAGATGCGG<br>TGAGCAGTTTAGTGTACGAGGCAAATGC<br>AAGGGTGAGAGACCCAGTATATGGGTG<br>CGTAGGCACGATATCTTACTTGCAGAAT<br>CAAGTGTCTGAATTGCAGCTTCAGCTTG<br>CAGCGGCCCAAGCAGAAGTTCTTTCCAT<br>GCAAATGCACCAAAGCCACATCTTGTA<br>CAACAAGATAGGGAGACGTCTTTTCTCA<br>TGGCTGGGGACAACCTCAACAGCGTGT<br>CACACTATATTGCCGCCAGTGTAATCCA<br>GGATCCTCTTAAGAGAGAGTCCTTTTCG<br>ACTTAA                                                                                                                                                                               |
| KCW87571         | Eucgr.B04019.1 | <i>EgLBD7</i> | ATGATGGGGGTGGGAGGTGCTAGGGAA<br>AGATTGGATGAGATAGCAAAGAAGATC<br>AAGAGAGAGAAGGATGCAACTTATGGT<br>GATGAAATGGGAAGAAGGCACATGATG<br>TTGAGCCTAAGCAGAACCGGAACGCTC<br>AACACGATAACGCCGTGCGCGGCGTGC<br>AAGCTTTTGAGGAGGCGATGTGCCGAA<br>GAGTGCCCTTTCTCCCCTTATTTCTCTCC<br>ACACGAGCCTCAGAAATTCGCCGCTGTT<br>CACAGAGTCTTCGGTGCAAGCAACGTC<br>TCCAAGATGCTCACGGAGGTACCGGAG<br>AGCCAAAGAGCTGATACCGCCAACAGT<br>TTGGTGTACGAAGCAAATCTGAGGCTG<br>AGAGACCCAGTGTACGGATGCATGGGT<br>GCAATCTCGGCTTTGCAACAGCAGATCC<br>AGACTCTGCAGGCTCAACTCAACGCTGT<br>AAGAAATGAGATACTGAGATTCAAATAC<br>AGAGAAGCCGTCACTACAAATCACGTA<br>CAATCCAATGTTGTCGTTCTCATTCTAG<br>AACTGCTCTTAATCCTACTGCTGCTTTGG<br>CTGTTTCCGTTGTTCTCCTCCAACCCTT<br>TCTTCGTCTTCTTCCACTGCCGCACCTC<br>CCGACCCCTCTCCTCCTCCTGCCGCC |

|                             |                                        |                        |                                                                                                                                                                                                                                                                                                                                                                                                                                                                                                                                                                                                                                                                                                                                                                                                                                                                                                                                                          |
|-----------------------------|----------------------------------------|------------------------|----------------------------------------------------------------------------------------------------------------------------------------------------------------------------------------------------------------------------------------------------------------------------------------------------------------------------------------------------------------------------------------------------------------------------------------------------------------------------------------------------------------------------------------------------------------------------------------------------------------------------------------------------------------------------------------------------------------------------------------------------------------------------------------------------------------------------------------------------------------------------------------------------------------------------------------------------------|
|                             |                                        |                        | <p> ACCCCGTCTTTAGTCGTGCCCTCATCTT<br/> CTTCCTCCTCCTCTTCCACTTCTTCTTTA<br/> TTCACTACCCCAACCAGCACCACCACCT<br/> ATAGCTCCATCTCTAGCGAAACTAATACT<br/> GTCCATTACTTCGAAACGATCTGA </p>                                                                                                                                                                                                                                                                                                                                                                                                                                                                                                                                                                                                                                                                                                                                                                              |
| <p> XP_010050<br/> 454 </p> | <p> Egrandis_v1_0.<br/> 045990m.g </p> | <p> <i>EgLBD8</i> </p> | <p> ATGCCTGCAGCTTCCAAAGCATGCGCCT<br/> CGTGTGCACACCAGCGGAAGAGGTGTG<br/> ACGGCAACTGCCAGTACGCTGAGCTCTT<br/> CCCGGCAAGCCGGTACGACGAGTTCCA<br/> GGACGCGCAGCGGCTCTTCGGCGTGAA<br/> CAACATGCACAACATCGTGAACGCGGT<br/> CGAGCCCGAGTTCAGGAAGCAGGCCGC<br/> CGAGTCGATACTCATGGAGGGCAACATC<br/> AGGAGAAGCGATCCCGTGCACGGGTGT<br/> CTCGGCGTTGCTCGGAGGCTCAAGTGG<br/> GAGATAGACCTGTGCCAGAAGCAGCTC<br/> GAGGACACGAACCGTCACCTATCTTTCC<br/> TCCAGCAGAGGGACCGAGAATTGCAGA<br/> GGCAACGGCAAGGGTTTAATGATACTCT<br/> TGTTGAACTCCCGCCGTTGCTGCCAGCG<br/> TTCTTCTCGAATGGGGGCGGCGTCAGGA<br/> GTTTCTATGAGCAGATGCAGCGTAACCC<br/> GACCACTACTCTGCTCGACTCGAGTTGC<br/> ATGAATTATCAAGGACTCAATTACCGATC<br/> GACGTACGAAGAAGGAGCGACCAGCAC<br/> TGAGCCCTTCGATCTCTTTCGCGTGACA<br/> GGGCCATGGAATGACAACCCGGCCGTG<br/> ACAATCGCGAGGGCGGACCAGATTACTA<br/> AACCTGAAGAGGCGAAGCAGGAGGATT<br/> CACGAAGGGTGTGCGATGATGGAACCG<br/> AGAGCGTGGAGCTACGTTTGAAGACC<br/> GGGACTTTGAATGTTGTGGCGATCAAGG<br/> CAAATAA </p> |
| <p> XP_010050<br/> 456 </p> | <p> Egrandis_v1_0.<br/> 037898m.g </p> | <p> <i>EgLBD9</i> </p> | <p> ATGCCTGCAACTTCCAAAGCATGCGCAC<br/> CGTGTAGACACCAAAAAGAAGAGGTGCA<br/> ACGGAAGCTGCGAAGTCGCCGACCTCT<br/> TCCCGGCGAGCCGGTACGACGAGTTCC<br/> AGAACGCACAGCGGCACTTCGGCGTGA<br/> GCAACATGCATGGCATCATA CGCGCGGT<br/> CGACCCCGAGATGAGGAAACAAGCTGC<br/> CGAGTCGATACTCATGGAGGGTAACATC<br/> AGGAGACGCGATCCCGTGCACGGATGT<br/> CTCGGGGTCGCTCGGAGATTGAGGTGG<br/> GAGATACGCTGCTGCGAGAAGCAGCTC </p>                                                                                                                                                                                                                                                                                                                                                                                                                                                                                                                                                                      |

|                  |                             |                |                                                                                                                                                                                                                                                                                                                                                                                                                                                                                                                                                                                                                                                                                                                                                                    |
|------------------|-----------------------------|----------------|--------------------------------------------------------------------------------------------------------------------------------------------------------------------------------------------------------------------------------------------------------------------------------------------------------------------------------------------------------------------------------------------------------------------------------------------------------------------------------------------------------------------------------------------------------------------------------------------------------------------------------------------------------------------------------------------------------------------------------------------------------------------|
|                  |                             |                | GAAGACGCGAATCGTCGCTGTCTTTGC<br>TTAGGCAGAGAGACTGGGAACTGAAGA<br>GGCTATGA                                                                                                                                                                                                                                                                                                                                                                                                                                                                                                                                                                                                                                                                                             |
| XP_010048<br>504 | Eucgr.C02148.1              | <i>EgLBD10</i> | ATGGCGTCGTCATCCACGTCCCCGTGCG<br>CCGCCTGCAAGTTCCTCCGCCGCAAGTG<br>CCAGCCCCGAGTGCGTGTTTGCGCCCTAC<br>TTCCCACCAGACCAGCCACAGAAGTTT<br>GCCAATGTCCACAAGTTTTTCGGGGCA<br>AGCAACGTGACGAAGCTTCTCAACGAG<br>CTCCACCCCCACCAGCGTGAGGATGCG<br>GTCAATCACTCGCCTACGAGGCCGACA<br>TGCGCCTGCGGGATCCGGTCTATGGCTG<br>CGTTGGGGTCATCTCCCTCCTCCAGCAC<br>CAGCTCCGCCAGCTCCAGATGGACCTCA<br>CCTGCGCCAAGTCTGAGCTCTCCAAGTA<br>CCAGAGCCTTGGCCTCGCCGCTGGCCA<br>CGGCCTCATCGCCGCTGCCGCGGCCGCG<br>GCCACCACCCACAACCACCCCCAGAAC<br>CTCGGCATCAACCTCCTCGGCCCTGCCA<br>GCTCGCGGGACCACCATCATTACCACCA<br>CCAGTTCTTTCCCCGTGACCACCAGCAC<br>CAGATGATCCGGGGCTTCGACGCGGGCT<br>CCA ACTACGACGCAAGCCTTCTCGCCAT<br>GAACGTCTCCGCGAGCATCGGCCAATTG<br>GGCCAGTTCCACCAGCCCAGGGCTGCC<br>GCCGGAGACGATCGCCGGAACATCGAC<br>CCTTCTTAG |
| XP_010051<br>281 | Egrandis_v1_0.<br>048576m.g | <i>EgLBD11</i> | ATGCCGACCACCGCCAGCGCCAACAGG<br>CCCGACTCGCGGGCGTGCGCGGCGTGC<br>CGGCACCAGCGCCGGAAGTGCCGTCCC<br>GACTGCCAATGGGCCGAGTTCTTCCCCG<br>CCGCCCTCCCCAGACCTTCGCCAATGC<br>CCGCTCCCTCTACGGCCTCAGGAACATG<br>AACGAGCTGACCAGGCTCCTCCCGCCC<br>GAGCTCCGCAGGACCGCCATGGAGACC<br>ATCATCTTCGAGTCCAACGTGAGGGCCT<br>TCGACCGCGTCGGCGGGTGCTACCGCAT<br>GATCCGCGATCTGGCTGCCAGGGTCCGG<br>CTGGTGGAGTGCGAGCTCAGGCACACG<br>CATCAGCTGCTCGCCTTGCTTCGCGGCT<br>CGGAGCTTAGTACTGATAACAATGTCGA<br>GGATGACGATCTAGGGTTGGCGCAAAA<br>ATCGAGTGAAGATCAAGGGTTTTGATG<br>CGTGACTATTTCTGTGACGGACGATCTCG                                                                                                                                                                                                               |

|                  |                             |                |                                                                                                                                                                                                                                                                                                                                                                                                                                                                                                                                                                                                                                                                                                                                                                                                                                                                                 |
|------------------|-----------------------------|----------------|---------------------------------------------------------------------------------------------------------------------------------------------------------------------------------------------------------------------------------------------------------------------------------------------------------------------------------------------------------------------------------------------------------------------------------------------------------------------------------------------------------------------------------------------------------------------------------------------------------------------------------------------------------------------------------------------------------------------------------------------------------------------------------------------------------------------------------------------------------------------------------|
|                  |                             |                | GAGCGTCGACTTCATCATGTTCGAGTCGA<br>TGAACCCTCAGGCGCGAATCGTGTTTGC<br>CAAGGCGACCGGCTACTGAATTTTCTTG<br>ATGAACAGATAATCAGGTTTCGATCCTCA<br>ACTTGGCATGCATATATTTCTCTAG                                                                                                                                                                                                                                                                                                                                                                                                                                                                                                                                                                                                                                                                                                                     |
| XP_010053<br>892 | Egrandis_v1_0.<br>052900m.g | <i>EgLBD12</i> | ATGAGCTCAAACCCTAGCTCGAGTGCAT<br>CCGCCAGCGGCGAGATCGCCAGCACCG<br>CCGGTGGTGAAGCGGTGGACCCTGCG<br>GAGCATGCAAGTTCTTGAGGAGGAAGT<br>GCATCACGGGATGTGTTTTTGCGCCCTA<br>CTTCGACTCGGAGCAAGGAGCGGCTCA<br>TTTCGCGGCAGTCCACAGAGTCTTCGGG<br>GCGAGCAACGCTTCGAAGCTGCTGCTG<br>AACATCCCAGCCCACAGGCGGCAAGAC<br>GCTGTTCGTGGCGATATGCTACGAGGCGC<br>AAGCTCGCCTTCGAGACCCTGTCTACGG<br>ATGCGTCGCCACATCTTTGCTCTCCAG<br>CAACAGGTGGTAAACCTACAAGCTGAG<br>CTCTCATATCTACAAGCCATCTTGGACC<br>ACTAGAGCTACCGACGCAACCTCTGCCA<br>CCCCTTCTTCCAATGCAGTTGCCGGTGG<br>CGCCACATTCTCTCTATAGCTGACCTT<br>CCAATTCGTCGGCCTCGCCATCCATGC<br>CCGCGCAATATGATGTATCGTCACTTTTT<br>GATCCGACGGTGCATCCATCCTCATGGG<br>CTGCTGGCACGCTACTGCGAAGGACAA<br>TTGATCCACGTCAATTCAGTGGCGGCTG<br>CTCATTACCAACCACCATGGTTCGAAGGA<br>GAGGGTGATCTTCGAGCATTGACAAGTG<br>AATTTCTCAGCACACAATGCCCTCCCCG<br>AATGCCTGATACTTCACCGACGCCGTGC<br>CCCTCTAAAAAAGACAAACCTTGA |
| XP_010056<br>297 | Eucgr.E01414.1              | <i>EgLBD13</i> | ATGAGTTCTAACCCCAGCTCTAGCGGCG<br>GAGGCGGAGGCGGCGGAGGGGGGAGT<br>GGCAGCGGCGGGGGCAGTGGGAGCGG<br>GAGCGGGAGCGGAGGGCCATGCGGCGC<br>GTGCAAGTTCCTGAGGAGGAAGTGCGT<br>GCCCCGGTGCATATTCGCGCCCTACTTC<br>GACTCGGAGCAAGGGGCGGCGCACTTC<br>GCGGCAGTGACAAGGTGTTTCGGCGCG<br>AGCAACGTGTCGAAGCTCCTCCTCCACA<br>TCCCCGTCCACAGGCGGCTCGACGCGG<br>TGGTCACCATATGCTACGAGGCGCAGGC<br>CCGCTCCGGGACCCCGTCTACGGCTGC                                                                                                                                                                                                                                                                                                                                                                                                                                                                                              |

|                  |                |                |                                                                                                                                                                                                                                                                                                                                                                                                                                                                                                                                                                                                                                                                                                                                                                                                                                                                                                        |
|------------------|----------------|----------------|--------------------------------------------------------------------------------------------------------------------------------------------------------------------------------------------------------------------------------------------------------------------------------------------------------------------------------------------------------------------------------------------------------------------------------------------------------------------------------------------------------------------------------------------------------------------------------------------------------------------------------------------------------------------------------------------------------------------------------------------------------------------------------------------------------------------------------------------------------------------------------------------------------|
|                  |                |                | <p>GTGGCCCACATCTTCGCCCTCCAGCAGC<br/> AGGTGGTTAACCTCCAAGCCGAGCTCTC<br/> TACTTACAAGCCCACCTGACGACGTTG<br/> GAGCTCCCGGTGCCTTTACCGCCTCCGC<br/> CGCCGCCCCAGCTATGGGGCCGCAGCT<br/> ATCAATAGCTGATCTCCCATCCGCTCGT<br/> CGATCCCCGCTACTTATGATTTGTCCTCG<br/> CTTTTGGATCCAATGGCACAAGCGGCGT<br/> GGATGGTGCCCCAACGGCAGATCGATTT<br/> CCGCCAATTCGAAGGCAGCTGTGGCGG<br/> CGGCGGGTCATCAGCTGCAGGCGGCGG<br/> CGATCTTAATGCGCTGGCCCCGGAATTG<br/> CTACGGCGGCAAGGATCTCCACCTCCTG<br/> GCTGCATAGACGCGATGTCATCGCCATC<br/> GTCCCTCTCAAAGTGA</p>                                                                                                                                                                                                                                                                                                                                                                                       |
| XP_010056<br>298 | Eucgr.E01415.1 | <i>EgLBD14</i> | <p>ATGAGCAATAAAAACGACAATAACACC<br/> GCCAGCAACAGCGATCCCAACGGGTCG<br/> TCGTCGTCGAGCACCGCAAGCGGCGGC<br/> GGTGGCGGCCCGTGCGGCGCGTCAAG<br/> TTCCTGCGGAGGAAGTGCCTGAGGGGC<br/> TGCGTTTTTCGCGCCCTACTTCGACGCCG<br/> ACCAGGGCCCCGCCACTTCGCCGCCG<br/> TGCACCGGGTGTTCCGGGGCGAGCAACG<br/> CCTCCAAGCTCCTCGCCCGGGTCCCCGC<br/> CCACCGCCGCCTAGACGCCGTCGTCACC<br/> CTCTGCTACGAGGCCCTCGCCCGGGCCC<br/> GCGACCCCGTCTACGGCTGCGTCGGCC<br/> ACATCTTCGCCCTCCAGCAGCAGGTGGT<br/> GAATTTGCAAGCCGAGCTAGCCTACGTT<br/> CAAGCCCGTCTCGCTTCGCTGCAGCACT<br/> TCCCTCTACAGCCACTGCCGCCCAAAG<br/> CCCGCCGCAGTCTGAACTCCAGTCCTCC<br/> TCCGACACGGCATTGCTCTCGGAAGTGG<br/> TGCCCAACCCGACTCTGCCAAACATGTA<br/> CTTCAACTCCTATCAGCTTCAAATGGT<br/> GCATTGGCTGGCCTGCCGAACTTTCGCA<br/> TGAATCTGGCTGAAGAACGGGAGATCG<br/> AAGATGCCCAACTGCATTCATTGGCTAG<br/> GGTTTTTATCTCTTCGTCGCCGACACTTGC<br/> CTCCTCCAGGGGTGAGATTCGACGGCTC<br/> GAGTCCGGGCAAGAATTTATAG</p> |
| KCW73537         | Eucgr.E02056.1 | <i>EgLBD15</i> | <p>ATGAAGGAGAGCGGTGGGGGCTGGAAG<br/> CAGGGGATGCCGTCGCCGTGCACGTTGT<br/> GCAAGCTGCCGCAGAGGAGGTGCGCGC</p>                                                                                                                                                                                                                                                                                                                                                                                                                                                                                                                                                                                                                                                                                                                                                                                                  |

|                  |                |                |                                                                                                                                                                                                                                                                                                                                                                                                                                                                                                                                                                                                             |
|------------------|----------------|----------------|-------------------------------------------------------------------------------------------------------------------------------------------------------------------------------------------------------------------------------------------------------------------------------------------------------------------------------------------------------------------------------------------------------------------------------------------------------------------------------------------------------------------------------------------------------------------------------------------------------------|
|                  |                |                | AGGACTGCGTGTTTCGCCCCGAACTGCC<br>CGGCCGACGAGCCCCACAAGTTCGCCA<br>ACGTCCACGAGGTCTTCGGCGCCAGCA<br>ATGTCAACAAGATGTTCCAGGTCACGCA<br>CCTCATCTCGTCATCCGTATAA                                                                                                                                                                                                                                                                                                                                                                                                                                                        |
| XP_010056<br>712 | Eucgr.E02018.1 | <i>EgLBD16</i> | ATGGAGGAGAGCAGCGAGGGGAGGAA<br>CCGGGGGACGCCGTTGGCGTGCGCAGC<br>GTGCAAGCTGCTGCGGAGGAGGTGCAT<br>GCAGGACTGCCTGTTTGCCCCGTA<br>CCAGCCAGCGAGCCCCACAAGTTCACC<br>AACGTCCACAAGGTTTTCGGGCGCCAGC<br>AATGTCAACAAGATGTTACAGGACCTAC<br>CAGAAGACCAGCGAGCAAACACCGTGA<br>GTAGCTGGTCTACGAAGCCAACGCC<br>GAGTACGGGACCCGGTCAATGGCTGCG<br>TCGGGGAGATAACGGCTCTCCAGAGCC<br>AGCTCGCCGACAAGATTGCTGAGGTGG<br>AGCGCCTTCAAGTCTTGCTGGAGGCGG<br>AGAAGTCTAATCGCAGCCCCAGCTCGTA<br>A                                                                                                                                                            |
| XP_010056<br>710 | Eucgr.E02016.1 | <i>EgLBD17</i> | ATGAAGGAAAGCGGTGGGAGCCGGAAG<br>CAAGGAACACCATCGCCGTGTGCGGCG<br>TGCAAGCTGCTGCGAAGGAGGTGCGCG<br>CAGGACTGCGTGTTTGCCCCATATTTCC<br>CGGCTGACGAGCCCCACAAGTTCGCCA<br>ACGTCCACAAGGTCTTCGGCGCCAGCA<br>ATGTCAACAAGATGTTACAGGACCTACC<br>AGTGCACCAGCGTGGGGACGCCGTGAG<br>TAGCATGGTCTATGAAGCCAACGCCCGC<br>GTACGGGACCCGGTCTATGGCTGCGTCG<br>GGGCCATCTCGTCTCTCCAGCAACAAT<br>CGACATGCTTCAGAGCCAGCTCGCCCA<br>GGCCAGGGCTGAGGTGGTGCACCTCCG<br>TGTCTGGCAAAACGCGACCATGTCTAAC<br>CATGGCCCGAGCCCAACCAGCCCGAGC<br>AACAGCGGGTCACCGTCATCACGGCTCA<br>TGGCCTCCCATGGCAAATCCATTTTTGAT<br>ATGGACATGATGGTGGACCAACCTAACT<br>TGGGAGACTCAGTCTGGTGA |
| XP_010056<br>894 | Eucgr.E02410.1 | <i>EgLBD18</i> | ATGGAGTCATCAGATACAGGTGCTTTCG<br>AATCGTCTCCTCCTTCATCTCTAGTTCT<br>CCGTCTTGGTCGTCTCCGACTCCTGCTC<br>TTCCGCTTCCGGTGGTTGTGGCCAGCCC<br>CTGCGCGCGTGTAAGACATTAAGGAG                                                                                                                                                                                                                                                                                                                                                                                                                                                  |

|                  |                |                |                                                                                                                                                                                                                                                                                                                                                                                                                                                                                                                                         |
|------------------|----------------|----------------|-----------------------------------------------------------------------------------------------------------------------------------------------------------------------------------------------------------------------------------------------------------------------------------------------------------------------------------------------------------------------------------------------------------------------------------------------------------------------------------------------------------------------------------------|
|                  |                |                | GAGATGCTCAGAGAGCTGTGTCTTGGCC<br>CCGTACTTCCCTCCCTCAGAGCCCGCCA<br>AGTTTGCCATCGCCCACCGCGTGTTCGG<br>CGCTAGCAACATCGTCAAGTTCCTGCTG<br>ACACTTCCCGAATCGCAAAGAGATGATG<br>CAGTGACCAGCATGATTTACGAGGCCAG<br>TACAAGGATTTCGAGACCCTGTCTACGGT<br>TGTGCCGGGGCAATAAGTCAACTCCAAA<br>TGCAAATCAGCCACCTCCACGCACAGCT<br>AGCCAAGTCACAAGCTGAACTCATAAG<br>CATGCAAATCCAACGGGCTAATCTCACG<br>GAACAATTGCAGATGACCAAGTCTCAG<br>GAGTCATTGCCGCAGCTGTCCGTTAAGG<br>GCCTCCTTAATAATCCATACGACTACCAA<br>ATAAACTCATGCTTGGATGATTATAATGG<br>CTTTGGCTCATTTTGGGATCCTCTCTGGA<br>CATGA |
| XP_010058<br>105 | Eucgr.E04355.1 | <i>EgLBD19</i> | ATGGAGGAGAGCAGCGAGGGGAGGAA<br>CCGGGGGACGCCGTTGGCGTGCGCAGC<br>GTGCAAGCTGCTGCGGAGGAGGTGCAT<br>GCAGGACTGCCTGTTTGCCCCGTACTION<br>CCAGCCAGCGAGCCCCACAAGTTCACC<br>AACGTCCACAAGGTTTTTCGGCGCCAGC<br>AATGTCAACAAGATGTTACAGGACCTAC<br>CAGAAGACCAGCGAGCAAACACCGTGA<br>GTAGCCTGGTCTACGAAGCCAACGCC<br>GAGTACGGGACCCGGTCAATGGCTGCG<br>TCGGGGAGATAACGGCTCTCCAGAGCC<br>AGCTCGCCGACAAGATTGCTGAGGTGG<br>AGCGCCTTCAAGTCTTGCTGGAGGCGG<br>AGAAGTCTAATCGCAGCCCCAGCTCGTA<br>A                                                                                  |
| XP_010059<br>846 | Eucgr.F00115.1 | <i>EgLBD20</i> | ATGAGCTGCAACGGCTGCCGGGTCCTTC<br>GAAAGGGTTGCAGCGAGAGCTGCGTGC<br>TGAGGTCGTGCCTGCGGTGGATCCCCTC<br>CCCCGAGGCCAGGGCAACGCCACCCT<br>CTTCTCGCCCGCTTCTTCGGCCGCAGC<br>GACCTCCTCTCCCTCGTCGCCGCCGTCC<br>CCGATTCTCAACGCCCCGCTCTGTTTCA<br>AAGCCTGCTGTTTCGAGGCGTGCGGGCG<br>CACGGTGAACCCGGTCGGCGGGGCGGT<br>GGGGCTGCTCTCCAGCGGCAACTGGCA<br>CGTGTGCGAGGCGGCGGTCGAGACGGT<br>GCTCGACGGCGGCGTCGTCCAGGCCCT                                                                                                                                                    |



|                  |                |                |                                                                                                                                                                                                                                                                                                                                                                                                                                                                                                                                                                                                                                                                                                                                                                                                                                                                                                                                                                                                                                      |
|------------------|----------------|----------------|--------------------------------------------------------------------------------------------------------------------------------------------------------------------------------------------------------------------------------------------------------------------------------------------------------------------------------------------------------------------------------------------------------------------------------------------------------------------------------------------------------------------------------------------------------------------------------------------------------------------------------------------------------------------------------------------------------------------------------------------------------------------------------------------------------------------------------------------------------------------------------------------------------------------------------------------------------------------------------------------------------------------------------------|
|                  |                |                | <p>CTGCGGCGGGCGCCGCCACCCTGGCCTTC<br/> GGGCTCGACCAATCCGCCGACTCGCCCT<br/> TCTTCCCGCCGAGCACGTGCAGGGGGC<br/> AGAGCCTGCAGCAGTCCCTGCAGGTGC<br/> CGGCGTCGATCCAGGTGGACGTCAACC<br/> TCACCTCCCCCTCTACGACCCGGACCT<br/> CAGCTTCAAGGAGAAGCTGCCCCGGGAA<br/> GAGACGCGGCAAGAGGAGCCACGTGAC<br/> AAATAATTGGCCCACCCGGACGACCAC<br/> GACGACCACGGCGGCGGCGACCACCCG<br/> CCTGAGCTCCGAGGCGTCGGAGGTGAT<br/> CGACCCCCCGAGCGGCTACGATCACGG<br/> CGGCGTGGGCCCCGGCGGTCAAGAGAC<br/> GAAGCTCCTGAACCTGTTTCGTATGA</p>                                                                                                                                                                                                                                                                                                                                                                                                                                                                                                                                                   |
| XP_010061<br>881 | Eucgr.F02492.1 | <i>EgLBD21</i> | <p>ATGAGGATGAGTTGCAACGGATGCAGA<br/> GTGCTGCGGAAGGGCTGCGGGCAGCAGC<br/> TGCAGCATCCGGCCTTGCCTGCAGTGGA<br/> TCAAGTCGCCCCGACTCCCAAGCCCACG<br/> CCACCGTCTTCTCGCCAAGTTCTACGG<br/> CCGCGCCGGCCTCATGAACCTCATCAAC<br/> GCCGGCCCCGAACACCTCCGCCCCGCG<br/> ATTTTCCGATCCTTGCTATACGAGGCCTG<br/> CGGCCGGATCCTGAACCCGATTCACGGG<br/> TCGGTCGGGCTGCTCTGGGACGGGAGC<br/> TGGCAGCTCTGCCACGCCGCCATGGAA<br/> GCCGTCCTCAGCGGGCGTGCCGATCACGC<br/> CGATCGCCTCGGCCGCCTCCGAGGCCGC<br/> CGCGCCGCCCTGAAGGCCTACGACATC<br/> CGGCACATCCCGAGGCAGGAGAACCCC<br/> GCCGCCGCCGCGGCGATGATGGCGGCC<br/> GCGGGCGAGGCCAACAGGGCGAGGCC<br/> GATCCGGTCCGGTCGGTTCAAGCGGCC<br/> GGAGCCCCGACGAAGGCTCAACGGCAC<br/> CCGGCGCCGCCGCCCGGCGGTGAG<br/> TGGTGTGACGAAGAGTCGAACCGGTGCG<br/> CCGAGCCACGACTCGTCTTTGAGCCACC<br/> AGTCGGTGCTGGGGGCCGGAACGCGG<br/> GGGTCGGGTTTCGGCGGCGGCGACAGCA<br/> AGGAGACGGAGAGCAACAGCATGGTGT<br/> CGGCGGAGACCACGACGACGACAGTGG<br/> CCGAGCCCCCTCAGCCGCTCCAGCCC<br/> AGCCGGAGCCGGAGTCGGCGGCTGCGG<br/> CGGGGGCGGCCGAACGGGAGGACGGA<br/> GCATCCGCCGAGCCGAGAGCGAAGTG</p> |

|                  |                |                |                                                                                                                                                                                                                                                                                                                                                                                                                                                                                                                                                                                                                                                                            |
|------------------|----------------|----------------|----------------------------------------------------------------------------------------------------------------------------------------------------------------------------------------------------------------------------------------------------------------------------------------------------------------------------------------------------------------------------------------------------------------------------------------------------------------------------------------------------------------------------------------------------------------------------------------------------------------------------------------------------------------------------|
|                  |                |                | GGGCTCGAGCTGACGCTAGGGTTCAAG<br>CCGGCGTCACGTGAGGACCACGTGATC<br>CCGGTCAAGAAGAGGAGGTTTCGAGCAG<br>AGAGACGAAGCGTGCAGCATGGAGCTG<br>GGGCTTTGA                                                                                                                                                                                                                                                                                                                                                                                                                                                                                                                                     |
| XP_010064<br>042 | Eucgr.F04424.1 | <i>EgLBD22</i> | ATGAAAGAGAGTGGAAGAAAACAAGG<br>AACGCTGTCGCCATGCGCGGCGTGCAA<br>ACTGCTCAGGAGGAGATGCGCTCGAGA<br>CTGCGTGTTTCGCTCCTTACTTCCCAGCT<br>GATCAGCCCCAGAAATTCGCTATCGTTC<br>ACAAGGTCTTCGGTGCCAGCAATGTCA<br>ACAAGATGTTACAGGAATTACTAGAGCA<br>CCAGAGGAGTGATGCGGTGAGCTCCAT<br>GGTGTACGAGGCAAATGCAAGGATGCG<br>AGACCCTGTATATGGCTGCGTTGGGGCC<br>ATATCGTCGCTGCAGCAACAGGTCGACG<br>TGCTTCAGAACCAGCTCGCGCTCGCGC<br>AGGCCGAGGTGCTCCACATGCGCCTGC<br>AAACGCCTCAGTTCCCTTCGACCTCGAG<br>CTCAGCCATCGCGGCCACCAACAACGAT<br>AGCTCGCATTCCAGGCGGTCATATTACC<br>CTTTGAACGGGGTTGAGCAGGCCGATG<br>TCGAGGACTCTTTGTGGTCATGA                                                                                             |
| XP_010065<br>916 | Eucgr.G01261.1 | <i>EgLBD23</i> | ATGAGCTGCAATGGATGCCGGTCTCTCC<br>GCAAGGGCTGCAGCGACACCTGCATGC<br>TCCGGCAGTGCCTCCAGCTCATCGACTC<br>CCCCAGGCCAGGCCACGCCACCCT<br>CTTCGTCGCCAAGTTCTTCGGCCGCGCC<br>GCCCTCATGTCTTCGTCTCCGCCGTCC<br>CCGCCTCCACCGCGCCGCTCTGTTTCA<br>GTCTCTGCTGTTTGAAGCGGTGGGGAG<br>GACGGTGAACCCCGTGGGAGGGGCGGT<br>GGGGCTGATCTGGGCCGGCAACTGGCG<br>GCTCTGCGAGGCGGCGGTCGACACGGT<br>GCTCCGCGGCGGCGCGCCGCACGCGCT<br>CCTCGAGCCCGCGGACGCCGTCCCGTC<br>GTTTCGAGCTCGACCGGAGCTCGGTGTC<br>GGAGGCGGACCACTTTAGGCCTCGGAG<br>CCCACCATCGCCGCCGCCACCGCCGCCG<br>CCGCCGCCGCCGCGGCATCCGCAGCCG<br>CCTCGGGACGAGCCCACGAAGGCCGGA<br>GAGGATCGCCTCGACCTGTCCCTGATGT<br>CTCCCGACTTGCGGCGGCGGCGGCGGC<br>GGCGGCCGCGGACCCCATCGGAGGAGG |

|                  |                |                |                                                                                                                                                                                                                                                                                                                                                                                                                                                                                                                                                                                                                                                                                                                                                                                                                                                                        |
|------------------|----------------|----------------|------------------------------------------------------------------------------------------------------------------------------------------------------------------------------------------------------------------------------------------------------------------------------------------------------------------------------------------------------------------------------------------------------------------------------------------------------------------------------------------------------------------------------------------------------------------------------------------------------------------------------------------------------------------------------------------------------------------------------------------------------------------------------------------------------------------------------------------------------------------------|
|                  |                |                | GGGAGGAGTCGGAGACGACGACGGCG<br>ACGTGGCGGAGCGGGTCGTCGGAGGGT<br>GGGTGGCCGAGGCAGGACGCGAAGCTC<br>CTGAGACTGTTCGTGTGA                                                                                                                                                                                                                                                                                                                                                                                                                                                                                                                                                                                                                                                                                                                                                         |
| XP_010066<br>723 | Eucgr.G02321.1 | <i>EgLBD24</i> | ATGAGAATGAGCTGCAACGGCTGCAGA<br>GTCCTCCGCAAGGGCTGCAGCGATGAC<br>TGCGTCATAAGGCCCTGCCTACAATGGA<br>TCAAGTCCGCCGATTCCCAGGCCACGC<br>CACCGTCTTCTCGCCAAGTTCTACGGC<br>CGCGCCGGCCTCATCAACCTCATCAATG<br>CCGGCCCTCCCACCTCCGTCCGGCCAT<br>TTTTAAGTCGCTGCTCTACGAGGCCTGC<br>GGTCGGATCATCAACCCCATATACGGGT<br>CGGTCGGGCTGCTCTGGTCCGGCAACT<br>GGGGGCACTGCCAAGCCGCCGTCGACG<br>CCGTCTCAGGGGCTCCTCCCACATCAT<br>GCGGCACCCTTCGCTGGATTCAAGTTTCG<br>ACCCCGGCCGCGTCTCAGCCCCACCCC<br>GCCCTTAAGGCCTACGACATCCGCCACT<br>TCCCAAGGCCGGGGGCTCACAAGGCC<br>TCCACAGGGCCCGGTTCAAGCGCCCCA<br>GGCTCGGCGTCGACCTGAAGCCGGACG<br>GCTGGCCTCACCCGGAGGCGAGCTACT<br>CGACATCGCCAGAGGATGACAGCGTGT<br>TCTCCGTGGAGACCGTGGAGGCTGAGC<br>CTGAGGGCCCGTCCCAGCCGAGCCAGA<br>TTTTGGCTTTCGACGGCCAAGGTGGTGA<br>GAGTGACGAGGATCGGGTCGGGTTGGA<br>GCTCACTCTTGGCGTGGCTCAGAGTCAA<br>CAACAGAGCGGCTCATGCAAATCTGAG<br>TCTGATCATGGTCAACACTCGTGA |
| XP_010068<br>859 |                | <i>EgLBD25</i> | ATGGAGAAGTACGAGGAGTCTCAGAAG<br>CCCCGATCGCTGCCCTCGCCCATCGCCA<br>TCCCTTCTCTCCTTTCTTCCCCACTCG<br>CCCACTTACTCCCACTCCCCGCCGTGCG<br>CGTCGCCCCCGCCGCCCCAGCCCCAGC<br>CCCAGTTCTGCCCGGGACCCCCGCCCC<br>ACGACGGCGGCCCCCCCGCCGTCCCCGC<br>CCGCGGTGGTCATGAGCCCTTGCGCCGC<br>CTGCAAGATCCTGCGGCGGAGGTGCGC<br>GGACAAGTGCGTCTGGCCCCCTACTTC<br>CCGCCGACGGAGCCGTACAAGTTCACC<br>ATCGCCACCGCGTCTTCGGCGCCGCCA<br>ACATCATCAAGTTCTTGCAGGAACTGCC                                                                                                                                                                                                                                                                                                                                                                                                                                                   |

|                  |                |                |                                                                                                                                                                                                                                                                                                                                                                                                                                                                                                                                                                                                                                                                                                                                                                                           |
|------------------|----------------|----------------|-------------------------------------------------------------------------------------------------------------------------------------------------------------------------------------------------------------------------------------------------------------------------------------------------------------------------------------------------------------------------------------------------------------------------------------------------------------------------------------------------------------------------------------------------------------------------------------------------------------------------------------------------------------------------------------------------------------------------------------------------------------------------------------------|
|                  |                |                | GGAGTCCCGGAGGGCCGACGCGGTGAG<br>CAGCATGGTCTACGAGGCGAGCGCGG<br>GATCCGCGACCCGGTGTACGGCTGCAC<br>GGGCGCCATCTCGCAGCTCCAGAAGCA<br>GGTCGTGGAGCTCCAGGCGCAGCTCGC<br>CAAGGCGCAGGCCGAGGTCGCGAACCT<br>GCAGTGCCAGAACACCAACCTGTTTCG<br>CCTCATCTGCATGGAGATGAGCCAGTCC<br>CAAGACCAGCCCGTCTTCCAGCAGCAG<br>TGCCCCGCTGCGATGGACGCGAGCTGCT<br>TCCCGGACGAGACCAACCTCATCCCTTC<br>TTGGGAGCTTTGGGCGTGA                                                                                                                                                                                                                                                                                                                                                                                                                |
| XP_010067<br>432 | Eucgr.G02955.1 | <i>EgLBD26</i> | ATGACAGGGCTTGGCTCTTCATGTGGTG<br>CATGCAAGTTCCTGAGGAGGAAGTGCA<br>CCAGCGACTGTGTTTTCGCTCCTTATTC<br>TGCTACGACCAGGCCTCGACCCATTTTCG<br>CGGCCGTTTACAAGGTGTTTGGCGCAA<br>GCAATGTGTCCAAGCTGCTGCTGCACCT<br>GCCAGTGACACCCGGAGTGATGCTGC<br>AATCACCATTTCTTATGAAGCCCTGGCC<br>AGGATGAGAGATCCCATCTATGGTTGCG<br>TGGCTCACATTTTTGCACTCCAGGAGCA<br>GGTGGCTAATCTGCAGGAGGAGATCGA<br>GATTCTAGGGACCCAAATGGCCAACCTT<br>GGAGTTGGGGTTCCAGTTGGAGAAAT<br>TCACCTGTTCCGGGTAACCCAGCAATT<br>TTGGTCCACAGTTCTCAGGGAGTGATGC<br>CATGAACGTGCAATTCTATCTGAACCAT<br>CAGCAGGACCCACTTCTTCTCAGGCA<br>GAAGCTGCTACCACCACCAACCTCCAG<br>GCCTTGAAAGCTCAATGAACGAAGAG<br>TTCCCTCCTATATATGGTTGGGAGGATCA<br>GAATCCGTTCTGTGACAATTACCCAAAT<br>CTTCTGGAGAGACTCTTTGAAGGTGTGG<br>ACCGTGAGGCCTTCAGCAGTTGTTTCATG<br>GCTGAACGGTGGAAATGGTTTAGGAAA<br>GTGA |
| XP_010067<br>553 | Eucgr.G03078.1 | <i>EgLBD27</i> | ATGAGGGCGATGCGAATGAAGCAAGCA<br>ATGAAGGGTCATGAGCCTCGTTCAGCT<br>CTTCTGTGCAGCCTGCAAGCTGTTGAA<br>GAGGAAGTGCACGTTCGACGTGCATCTTT<br>GCGCCGTACTTCAGGTCCGACGAGCCG<br>AAGAAGTTCGCCAAGGTGCACAAGGTG<br>TTTGGGGCGAGCAATGTGAGCAAGATC                                                                                                                                                                                                                                                                                                                                                                                                                                                                                                                                                                   |

|                  |                |                |                                                                                                                                                                                                                                                                                                                                                                                                                                                                                                                                                                                                                                                |
|------------------|----------------|----------------|------------------------------------------------------------------------------------------------------------------------------------------------------------------------------------------------------------------------------------------------------------------------------------------------------------------------------------------------------------------------------------------------------------------------------------------------------------------------------------------------------------------------------------------------------------------------------------------------------------------------------------------------|
|                  |                |                | <p>CTGGTTGAGGTTCCCGAGGAGCAGCGG<br/> GAGGACACGGTGAAC TCACTCGCTTAC<br/> GAGGCCGAGGCAAGGCTGCGGGATCCG<br/> GTCTACGGGTGCATCGGGGCGATAGCGC<br/> TGCTCCAGAGGAAGATGCTTGAGCTGC<br/> AACATGATCTAGCCATTGCTCGGGCCCG<br/> TCTCGCTCGATATAACCGTGCCTGCAGTG<br/> AGCACGAGTTCGCCGAGCGTCTTGATG<br/> GATGAGAACGTTGGCATGGTGTCTTTCT<br/> ATGACATGCCTTGCTGCAGTGGAGTGAA<br/> TGAGAGTTTCGGCCAGAGTTCATCACAA<br/> TTGACCCAAGTCCAACCCATGAATGATT<br/> TTGGCCAGTTCCTTACATCTTTTGA</p>                                                                                                                                                                                          |
| XP_010067<br>560 | Eucgr.G03089.1 | <i>EgLBD28</i> | <p>ATGGGGGAAACTCGCCTTGTGCATCTT<br/> GCAAGTTGCTGAGACGTCGATGCGCTA<br/> AAGGCTGCATATTCGCTCCTTATTTTCT<br/> CCAGATGATCCTCACCGTTTCGCCATTG<br/> TCCACAAGGTCTTTGGTGCAGCAACAT<br/> CAGCAAAATGTTGCAGGAGCTACCAGT<br/> GCATCAGAGAGCTGATGCTGTGAGCAG<br/> CCTTGTGTACGAAGCCAATGCAAGAGTC<br/> CGAGACCCCGTGTACGGATGCGTTGGC<br/> GCCATCTCCTACCTCCAAAACCAGGTGG<br/> CTCAGCTACAGATGCAGCTCGCTGTGGC<br/> TCAGGCCGAGATCCTGTGCATAACAAGTC<br/> CAGCAAGAGCCCGTGGCCATGCCGTCT<br/> CCAGTTGTACCGATGGACAGCTCAGAC<br/> GACAAGTCGTTCTTCTCCACAATAACC<br/> TCCCTCAGTACTTTAACTTGGCGTCAA<br/> CTCCAGCAATGTAAC TCATGAGTCTCTC<br/> AAGAGAGAGAGCTTCTTTGGACATGAC<br/> ATGGTTTCTTAA</p> |
| XP_010067<br>591 | Eucgr.G03121.1 | <i>EgLBD29</i> | <p>ATGTCCAGAGAAAGTAGGGAGAGATTT<br/> GATGAGATAGGCAAGAAGATCAAAGA<br/> GACGGAGATGCTTCGCATCATCATCTTAT<br/> GGGAAGGAGACACATGCTGGGTCCTCC<br/> AGGAACCCTAAACACCATCACTCCCTGT<br/> GCAGCCTGCAAGCTCTTGAGAAGGAGG<br/> TGTGCTCAAGAATGTCCTTTCTCTCTTA<br/> TTTCTCTCCCATGAACCCAGAAATTC<br/> GCTTCTGTTCATAAAGTCTTCGGCGCCA<br/> GCAATGTCTCCAAGATGCTCATGGAGGT<br/> ACCTGAGAGCCAAAGAGCTGACGCAGC<br/> GAACAGTCTCGTCTACGAAGCGAATGT</p>                                                                                                                                                                                                                              |

|                           |                                      |                       |                                                                                                                                                                                                                                                                                                                                                                                                                                                                                                                                                                                                                                                                                                                                                                                                                                                                                                                                                                                                                                                                                |
|---------------------------|--------------------------------------|-----------------------|--------------------------------------------------------------------------------------------------------------------------------------------------------------------------------------------------------------------------------------------------------------------------------------------------------------------------------------------------------------------------------------------------------------------------------------------------------------------------------------------------------------------------------------------------------------------------------------------------------------------------------------------------------------------------------------------------------------------------------------------------------------------------------------------------------------------------------------------------------------------------------------------------------------------------------------------------------------------------------------------------------------------------------------------------------------------------------|
|                           |                                      |                       | <p>GAGGCTGCGAGACCCAGTTTACGGGTG<br/> CATGGGTGCGATTTTCGGCTTTACAACAG<br/> CAAATTCAGTCCTTGAAGCTGAGCTAA<br/> ACGCGGTGAGGTCCGAAATCCTCAAGT<br/> ACAAGTATAGAGAAGCAGGCATCATCAG<br/> TCCCACTTCTCATGTGACTTTGCTTTCAC<br/> CGGGCACAGTCTCCATTGCCGCGCCGCC<br/> TCCCACCCCGCCACCGCAGTCTGCTCCT<br/> ACCTCATTGCCGCCTCCTCTCCCGCCTG<br/> CCTCCTCGCCTCCTTCCTTGTTTACACA<br/> GCCGGGTGGCACAACCTGACTACGGCGG<br/> CATCTCCAGCGAGAATGTCTCTTATTTG<br/> GTAA</p>                                                                                                                                                                                                                                                                                                                                                                                                                                                                                                                                                                                                                                             |
| <p>XP_010070<br/> 501</p> | <p>Egrandis_v1_0.<br/> 045772m.g</p> | <p><i>EgLBD30</i></p> | <p>ATGTCGTCGTCGAACTCTCCTTGCGCCG<br/> CGTGCAAGTGCCTCCGCAGGAAGTGCA<br/> CCCAGGAGTGCGTCTTCGCCCCCTACTT<br/> CCCCGCCGACCAGCCGCAGAAGTTCGC<br/> CTACGTACACAAGGTGTTTCGGCGCGAG<br/> CAACGTGACTAAGCTCCTCAACGAGCT<br/> GAACGTCTCGCAGCGCGAGGACGCCGT<br/> CAACTCCCTCGCCTATGAGGCTGAGACC<br/> CGCTGCGGGACCCGGTCTACGGCTGC<br/> GTCGGCCTCATCTCTATCCTCCAGCACA<br/> AGCTCGACCTGCTCCAGAAGGAGCTCG<br/> CCTCTGCCAAGAAGGAGCTCGCCACCT<br/> ACGTGGGGCCCCACGCGATGATACCCAC<br/> CATGATGCAACCCTCTGGAGCTCCGCCG<br/> TACATGGGAAATCCTTCGATGTCAGCGG<br/> TGGTGCCTTACAACATGATGCCGATGAT<br/> GGGAATCCCGACTGCTGCCGCTGCTGGC<br/> GGGCCACCGCTAGTCATCAGGGACCAC<br/> CAGAGCCAGCAGCAGCAGCAGCAGCAG<br/> CAGCAGCAGCAGGCGTTTGATGCGCAG<br/> CAACTCGCAGCCGCCGTGGCAGCGAGG<br/> GAGCGGCAAGAGATGATTAGGGCTTATG<br/> AGCAGCAGCAAATTAGACAGCAGCAAC<br/> AGCAACAACCTGAAATCAAGTTCGACG<br/> CAAGCGGCTTTGACGGTGTGCGGGAAC<br/> CGGTGTCTCCGTCCAGGTACAACAACCC<br/> CACAAGCAATGTAATCTCTCCACCGCCG<br/> GCTTCCCCGTCCCTGGCTTTGGGGAGTT<br/> TCGACAATCCGTACCAGATTCAGGCGCA<br/> CCAGCTCTCGCTGCAGCCACAACAGGG<br/> ACAAGCACAAGATCAGCAAGAGCATGC</p> |

|                  |                             |                |                                                                                                                                                                                                                                                                                                                                                                                                                                                                                                                                                                                                                                                                                                                                                                                                                                                                                                                                                                                                                                                        |
|------------------|-----------------------------|----------------|--------------------------------------------------------------------------------------------------------------------------------------------------------------------------------------------------------------------------------------------------------------------------------------------------------------------------------------------------------------------------------------------------------------------------------------------------------------------------------------------------------------------------------------------------------------------------------------------------------------------------------------------------------------------------------------------------------------------------------------------------------------------------------------------------------------------------------------------------------------------------------------------------------------------------------------------------------------------------------------------------------------------------------------------------------|
|                  |                             |                | TCAAGAGCAGAGGTCTGGGAGCGAGGA<br>GCGAACCAACAACAACCGGTGGTCC<br>TTCCTGTTGA                                                                                                                                                                                                                                                                                                                                                                                                                                                                                                                                                                                                                                                                                                                                                                                                                                                                                                                                                                                 |
| XP_010026<br>421 | Egrandis_v1_0.<br>050617m.g | <i>EgLBD31</i> | ATGTCGTCGCTGAGCTCCCCGTGTGCTG<br>CGTGCAAGTGCCAACGCCGAAATGTA<br>CCCCTGAGTGCGTGTTCGCCCCCTACTT<br>CCCCGCGGACCAGCCCCAGAAGTTTGC<br>CTATGTCCATGAGGTCTTCGGCGCGAGC<br>AACGTGGCCAAGCTCTTGAACGAGCTC<br>CATGTGTCGCAGCGGAAGACGCAGCA<br>AACTCCCTCACCTACGAGGCCGAGGTC<br>CGCCTCCGTGATCCCATCTATGGGTGCG<br>TTGGGCTCATCTCCATCCTCCAGCACAA<br>GCTCAACTTGCTGCAGAAGGAGCTCAG<br>CAATGCCAAGAAAGAGCTCGCTGCCTA<br>CATGGGACCCCACTCAATGATGCCAGCC<br>ACAGTGCAACCTCCTGGGGCGATGTTTC<br>CGGCCGGTAATCCCTTGTTCGTCCATGAT<br>GGCATTGCACAACACGGTGCCGGTCATC<br>ACGACTAGGGGCAAGGGCGACGCACTA<br>TGGCATGGTGGAGGGTTCGACGTTGGTA<br>GACCAACAACCTGTTGCTTGAAGAACAT<br>CAACTGGCGGCTATTGCAGCGGCGAGG<br>GAGCAACAAGACATGGGTAGGGTTTGT<br>GAGCAGCAGCAAATTAGGAGGCATCAT<br>GATCAACAGCAACTGCAAAGTCAACAT<br>GAAACTAAGTATCGCACAAATGGTTCTG<br>ACTGTGTTGGGGAATTTGTTTCTGCAAT<br>ACAGTACCACACCGCAAATAATGCAATT<br>CCTCCAGGCCCGGCTTCGCCATCACTAG<br>CATTGGGTAGTTTCATGAACCCATACCA<br>CGAGCAAGCTCATCGTCTCTCGTTGAAG<br>TCGGAACAAGCATGCATCGAAAAACAT<br>CAAGAGCAACGATCCGGTGGCATGGAG<br>GGCCAGAATGATGATGTCGGCCTTTCCT<br>GGTGA |
| XP_010070<br>643 | Eucgr.H02293.1              | <i>EgLBD32</i> | ATGAGCTGCAACGGTTGCAGGGTTCTG<br>AGGAAGGGCTGCAGCGAGTCCTGCATC<br>TTGCGGCCTTGCCTGCAGTGGATCGAGG<br>CCCCGAGGCCAGGGCCACGCCACCG<br>TCTTCGTCGCCAAGTTCTTCGGCCGCGC<br>CGGCCTGATGTCCTTCATCTCCGCCGTC<br>CCTGAGACGCAGAGGCCCGCGCTGTTTC<br>CAGTCGCTGCTGTTTGAAGCGTGCGGA                                                                                                                                                                                                                                                                                                                                                                                                                                                                                                                                                                                                                                                                                                                                                                                                 |



|                  |                |                |                                                                                                                                                                                                                                                                                                                                                                                                                                                                                                                                                                                                                                                                         |
|------------------|----------------|----------------|-------------------------------------------------------------------------------------------------------------------------------------------------------------------------------------------------------------------------------------------------------------------------------------------------------------------------------------------------------------------------------------------------------------------------------------------------------------------------------------------------------------------------------------------------------------------------------------------------------------------------------------------------------------------------|
|                  |                |                | <p>AGGACGGTGAACCCGGTGAACGGGGCG<br/> GTGGGACTGCTGTGGACCGGCAACTGG<br/> CCCGTCTGCCAGGCTGCGGTGGAGACC<br/> GTCCTGCGCGGCGGCTCGCTTCGGGCCA<br/> TGCCGGAGCTCCTCGACGGCGGGCGGCG<br/> GCGGCGGGCGGCTCCCTCCCGGCGTCCG<br/> ACGAGGCCTCGGAGGCCGGTGACACGT<br/> GCGCCGACGCATGGAAGCTCCGCGATC<br/> CGAATCCGGGATCCCGATTCTCCACTTC<br/> CAGGTCGAGGATCTCCCCGAAGCGCAA<br/> GAGGCTCGACGCCGCCGACAAACGC<br/> TAAGCTCCTACTCCAGCCGATGGATCTC<br/> GATCTCCGCCTCACGCCGACGGACTTCC<br/> AGGCCAAGACCAAGCCCAGTGAAGG<br/> CCGAGCACCAGACGCGGCGGCCGGGGA<br/> CCCCGTCGATGACTTCGGAGGAGTCCG<br/> GCACCACGACGTGCTTCGAGAGCAACA<br/> ATAATGTGGGAGAGCCGGAGACGAAGC<br/> TCCTCAACTTGTTTCGCCTAA</p>                        |
| XP_010029<br>135 | Eucgr.I01750.1 | <i>EgLBD33</i> | <p>ATGGCTTCTTCGAGCTATTCCAATCCGCC<br/> ATGTGCAGCCTGCAAATTCCTCAGGCGG<br/> AAATGCCTGCCTGACTGCGTGTTCCGCC<br/> CTTACTTCCCGCTGAGGAGCCCCAGAA<br/> GTTTGCCAACGTCCACAAGATCTTCGGT<br/> GCGAGCAATGTGAGCAAGCTCCTCAAC<br/> GAAGTCCTCCCCACCAGAGGGAAGAC<br/> GCCGTCAACTCTCTCGCCTATGAGGCCG<br/> AGGCCCGCATGAAGGACCCGGTTTACG<br/> GCTGCGTGGGGGCGATCTCAGTGCTCCA<br/> GCGACAGGTCATCAGGCTACAGAAGGA<br/> GCTGGATGCGACGAACGCTGACCTGAT<br/> GCGCCACGCGTGCAACGAGATGGCGGG<br/> TAACACCTCGCTCCAGGGCCTAATCCC<br/> GGCCACAACCTATTCCGGATCACCGAGAG<br/> AGTCATCTAGATAACAACGAGAACAATCC<br/> CGGGTATTATTACCCTCCCAATTATAATC<br/> CCTGGTCCGGCGGTCCAGTGGAGATCC<br/> TGATCAGGGAGGAGGAAGTGCTGTCTA<br/> A</p> |
| XP_010030<br>769 | Eucgr.I01908.1 | <i>EgLBD34</i> | <p>ATGACGATCAAAGGAGGGACGAGCCAG<br/> GCGTGC GCGGTCTGCAAGTTCAGCGG<br/> CGGAAGTGCCACAAGGAGTGCCCCCTC<br/> GCCCCCTACTTCCCGGCCGACCAGCCGA<br/> AGATGTTCCAGAACGCGCACCGCTCTT</p>                                                                                                                                                                                                                                                                                                                                                                                                                                                                                                 |

|                  |                             |                |                                                                                                                                                                                                                                                                                                                                                                                                                                                                                                                                                                                                                                                                                                                                                                                               |
|------------------|-----------------------------|----------------|-----------------------------------------------------------------------------------------------------------------------------------------------------------------------------------------------------------------------------------------------------------------------------------------------------------------------------------------------------------------------------------------------------------------------------------------------------------------------------------------------------------------------------------------------------------------------------------------------------------------------------------------------------------------------------------------------------------------------------------------------------------------------------------------------|
|                  |                             |                | <p>CGGCGTCAGCAACATCACCAAGATCCTC<br/> AAGCAGGCCCCGCCGGACCTCAAGCAG<br/> GAGGCGATGCAGTCGGTCACTTTCGAGT<br/> CCAACATGCGCGCGCAGTACCCCGTCCA<br/> CGGCTGCTGCTGGTACATCCGCCGCCTC<br/> CTCTGCCAGCTGCACCAGGTGACCGAG<br/> GAGTCCAGCACGTCAACACGCAGATC<br/> GCCATGTGCCGGGACCAAGTCTCGGCCT<br/> CCGCCTCACCTCTCACTATCCTCCTCC<br/> ACCCGAACTGCAATTGGGGAACGTCCA<br/> CGCAGACGCCGTCCCGACCCGACAATC<br/> TTTCCCGGGCGTTTTTCGTGAACGGGGAA<br/> AGTACTAAACAATCTATAATGTCTCAGC<br/> AACCATATAATTATGAGCCCGAGAACAC<br/> TAGTCACGTCGGGGCGGCTCAGCCGAA<br/> CCTGGCTTCATTACCTGAACTTCTAATGA<br/> ATTATGGTGC GGACGTGTTCAGCTATGA<br/> GGACGTGCCATTTGACACGATCACGATC<br/> GATAAGGAGGAGTCGAGCACGGAATCG<br/> TCGTTCTCGTTCAAGAACATGACGCATT<br/> CCATCGAACACGCCTCGCGCAATGATCT<br/> GAAGAATGCAGCCGCAGGATTACAGCCT<br/> AAAGAGTGTCAGATAA</p> |
| KX840005         | Egrandis_v1_0.<br>044837m.g | <i>EgLBD35</i> | <p>ATGGACGACAATGGAAGTGGAAGCTTA<br/> AGCACAACCGCACCATGTGCAGCTTGC<br/> AAGCTTTTGGAGAGGAGGTGCGCCCAA<br/> AATTGCCCTTTTCTCTATATTTCTCGCC<br/> TCAAGAAACCCACAAGTTCAAATTATTT<br/> CATGAAGTTTTTGATGCTAGCAACTTCT<br/> TCAAGATCCTCATGATAAACCTAGCCA<br/> AAAAGCTGAAGCTGCAAATAGTCTTGC<br/> GTATGAAGCAAGTTTGAGGGACAGAGA<br/> TCCTGTTTCATGCAAGCATGGGCGTGATC<br/> TCTGCCTTGCAAGGCCACATTCAGAGTG<br/> CACGGGCCGAGCTCAATGCAGTTAGAG<br/> CACAAATGTCAAAGTATAGGGACCAAG<br/> CAGGCATTGTCCCTCCTCCAATGATGG<br/> CTTGCTTCTGCCTAACATCGCTGCTTCA<br/> ACGGTCGCACACGTGCGCCGTCAAACCT<br/> GCCTCGTCTCCATCCAAGCTCGCCATCC<br/> TCTTCTCCTCCTCCTCTTCCATGCTCTC<br/> ATGGCCAAGCCTTCCGTCCAAAATTAG</p>                                                                                                                                |
| XP_010031<br>173 | Eucgr.J00175.1              | <i>EgLBD36</i> | <p>ATGGGCGGGCACTCGCCGTGCGCGTCTG<br/> TGCAAGTTGCTGAGGCGCCGGTGC</p>                                                                                                                                                                                                                                                                                                                                                                                                                                                                                                                                                                                                                                                                                                                             |

|                  |                |                |                                                                                                                                                                                                                                                                                                                                                                                                                                                                                                                                                                                                                                                                                                                                                                                                                                                                     |
|------------------|----------------|----------------|---------------------------------------------------------------------------------------------------------------------------------------------------------------------------------------------------------------------------------------------------------------------------------------------------------------------------------------------------------------------------------------------------------------------------------------------------------------------------------------------------------------------------------------------------------------------------------------------------------------------------------------------------------------------------------------------------------------------------------------------------------------------------------------------------------------------------------------------------------------------|
|                  |                |                | <p>AAGGACTGCATCTTCGCTCCTTACTTCC<br/> CTTCCGACGACCCCCACAAGTTCGCCAT<br/> CGTTCACAAGGTCTTTGGTGTAGCAAC<br/> ATTAGCAAGATGTTGCAGGAGCTTCCGG<br/> TTTGTGAGAGAGCCGACGCGGTGAGCA<br/> GCCTGGTGTATGAAGCGAGCGCGAGGG<br/> TCCGGGACCCGGTCTACGGGTGCGTGG<br/> GCGCCATCTCCTACTTGCAGAACCAGGT<br/> GTCCCAGCTGCAGACGCAGCTCGCGGT<br/> GGCCAAGCGGAGATCATGTGCTTCCAA<br/> ATGCAGCAAGACTCGGCGGTGATGCAG<br/> CTCCCGCGCATGATGGACGTCCCCGATG<br/> ACGACAGGTCGTCGTCGCCGTTCCCTCT<br/> ACCGAACAACTCACCCACTTCCTAAC<br/> TTGTCCCCCGCCTCTTCAGGCAATGTAA<br/> CCCACGACCACCCTCTCAAGAGAGAGA<br/> GCATTCTCGGGCATGACGTGGTGTCTTA<br/> G</p>                                                                                                                                                                                                                                                                    |
| XP_010032<br>234 | Eucgr.J01123.1 | <i>EgLBD37</i> | <p>ATGGAAATGGAATACAAGGCGAGAACA<br/> ACCACTATAACCAGCACCCGTCACAATTC<br/> CCACTAAAGTCTTCTTCCCTTACTCAAC<br/> ATCATCCTCATCTTCTTACCGCCACCAC<br/> AACCACCATCATCTCAGTCCTCATCTCC<br/> AACCCTCCTCCTCCTCATCCTCCCCCT<br/> CCTCCTTCTTCCCTTCCCATTACCCCACT<br/> GCCGCCGCCGCCGCCGCCGCCGAGTCCT<br/> CAGCCCGTGTGCCGCTGCAAGATCCTG<br/> CGCCGGCGGTGCGTGGACAAGTGTGTC<br/> TTGGCCCCGTAATCCCGCCCACCGAGC<br/> CTTACAAGTTCACCATTGCGCATCGAGT<br/> GTTCCGAGCTAGCAACATCATCAAGTTC<br/> TTGCAGGAACTTCCAGAACCGCAGAGA<br/> GCGGATGCAGTGAGCAGCATGGTGTAC<br/> GAGGCCAACGCGAGGATCCGAGACCCG<br/> GTCTACGGCTGCGCCGGAGCCATCTGCC<br/> ACCTCCAGAAGCAAGTAAGCGATCTCC<br/> AAGAGCAGCTCGCCAAGACTCAAGCCG<br/> AGCTCGTCAACCTCGAGCTGCAGCGGG<br/> TGAACCTCGTCGCGGCATGCATGAAAT<br/> GGCTCAATCCCAAGAGCCGAACATCAAT<br/> TTCCAGCAGCAACTCGCCGACTCAACC<br/> GGCTTCTTGGAGGATGGCTCGGCTAGCT<br/> GGGAATCGATTTACTGGACGTGA</p> |
| XP_010032        | Eucgr.J01501.1 | <i>EgLBD38</i> | <p>ATGCGGATGAGCTGTAACGGGTGCAGG</p>                                                                                                                                                                                                                                                                                                                                                                                                                                                                                                                                                                                                                                                                                                                                                                                                                                  |

|                  |                |                |                                                                                                                                                                                                                                                                                                                                                                                                                                                                                                                                                                                                                                                                                                                                                                                                                                                                                                                                                                                                                                                                                                                                                       |
|------------------|----------------|----------------|-------------------------------------------------------------------------------------------------------------------------------------------------------------------------------------------------------------------------------------------------------------------------------------------------------------------------------------------------------------------------------------------------------------------------------------------------------------------------------------------------------------------------------------------------------------------------------------------------------------------------------------------------------------------------------------------------------------------------------------------------------------------------------------------------------------------------------------------------------------------------------------------------------------------------------------------------------------------------------------------------------------------------------------------------------------------------------------------------------------------------------------------------------|
| 636              |                |                | <p>GTGCTCCGCAAGGGCTGCAGCGAGAGC<br/> TGCAGCATCCGGCCCTGCCTCCAGTGGA<br/> TCAAGAGCCCCGAGTCCCAGGCCACG<br/> CCACCGTCTTCTCGCCAAGTTCTACGG<br/> CCGCGCCGGCCTCCTCAACCTCCTCAAC<br/> GCCGGCCCCGACCACCTCCGCCCTATCT<br/> TTAGGTCCTTGCTCTACGAGGCGTGCGG<br/> CCGGATCGTGAACCCGATATACGGCTCC<br/> GTTGGGCTCCTGTGGTCCGGGAGCTGG<br/> CAGCTCTGCCAGGCCGCCGTCGAAGCC<br/> GTGCTCAAGGGCGTGCCCATCACCCCGA<br/> TCGCCTCCGAGGCGGCGGCCAGCAGTC<br/> ACGCCCCGCCCTCCAAGGTCTACGACAT<br/> CCGCCACGTCTCCAAGGACGAGACCGC<br/> CGCCGCCGTGGCCGATCTCCACCGCGTC<br/> AGGGCTCGCTGCCGGTTCAAGCGATCCT<br/> TAGCCAAGGCTAGGTCGTCGACGTCGTC<br/> CGCGTCGGCGGGCGGCGGGCGACGGA<br/> GTTGGCGCCGGTTCAGGACGAGCCGGC<br/> GAAGTCCTCCGACGACGAGCCCAACCG<br/> GTCGACGAGCCACGAGTCGTCGCTGAG<br/> CCACCAGTCCGAGGTAATCGCCGCGGC<br/> GGCGGCGGCCAGCGCGGAAGGCGACA<br/> GCAAGGAGACGCTGAGCGCGGTGTCCG<br/> AGGAGACTGCCGAGCCGCCGCTACTGT<br/> TCCGGGCCGCCGAGCGGGAGCCGGACT<br/> TGGCCGATCGCCGGCCGGGCGGGGCTG<br/> AGGAGATCGGGCTGGAGCTGACCCTGG<br/> GGTTTGAGCCGGTGGCACGTGCCAATC<br/> ACGTGGTCCCGGTGAAGAAGAGGAGGT<br/> TCGAGGATTGCGGAGCGAGCTCTAAGAT<br/> GGAGTTGGGCCTGGACTGCTCGGCCCAT<br/> TTAGGCGGAAGCCCCAAAATCAATCCTTT<br/> GA</p> |
| XP_010033<br>317 | Eucgr.J02237.1 | <i>EgLBD39</i> | <p>ATGGCTTCATCATCTGGTTACTCCAGCTC<br/> TCCGTGTGCTGCTTGCAAGTTCTTGAGG<br/> AGAAAGTGCCTGCCTGATTGCATCTTCG<br/> CGCCCTACTTCCCTCCTGAGGAGCCCCA<br/> GAAGTTCGCCAACGTCCACAAGATATTT<br/> GGGGCTAGCAACGTGAGCAAGCTCCTC<br/> AATGAGGTCTTCCCCACCAGAGAGAG<br/> GACACCGTCAATCACTCGCTACGAGG<br/> CCGAGGCAAGGCTCAAAGATCCGGTGT<br/> ACGGGTGCGTGGGAGCTATATCAGTGCT</p>                                                                                                                                                                                                                                                                                                                                                                                                                                                                                                                                                                                                                                                                                                                                                                                                      |

|                  |                             |                |                                                                                                                                                                                                                                                                                                                                                                                                                                                                                                                                                                                                                                                                                                                                                         |
|------------------|-----------------------------|----------------|---------------------------------------------------------------------------------------------------------------------------------------------------------------------------------------------------------------------------------------------------------------------------------------------------------------------------------------------------------------------------------------------------------------------------------------------------------------------------------------------------------------------------------------------------------------------------------------------------------------------------------------------------------------------------------------------------------------------------------------------------------|
|                  |                             |                | <p>TCAAAGGCAGGTCATCAGGCTCCAAAA<br/> GGAGTTGGACGCGACGAACGCTGATCT<br/> CATCCAGTACACCTGTCGCGAGATGCCA<br/> AGCACGGTGTCTAGGCCTGTGCATTATC<br/> GGAGGAAGAATAATAACAACATGGTTCA<br/> AGTTTATGGAGACGGTGGTTTCGATCAG<br/> AACTGTGGAGGGTATTATCATCCTAATGC<br/> TTGGAGTAATGTCCATGATGGAGATGGC<br/> CAAGAGGGAGATGATGGAGGTATGTGA</p>                                                                                                                                                                                                                                                                                                                                                                                                                                       |
| XP_010033<br>333 | Eucgr.J02250.1              | <i>EgLBD40</i> | <p>ATGGACGGCGGCGGCGTGAGGAGGAGG<br/> AGGAGGAGGAGGAGGAGGAGGGCATG<br/> TGCTCGCTGCCGGTAATGAAGAAAAA<br/> GTGCTGGAAGGACTGCAGGTGGGCACC<br/> GTACTTTCCCGCGGGAGAGCACGAACG<br/> CTTACCATCCTCCACAGGGTCTTTGGC<br/> GGTAACATGATAATGGAAATCCTACAGC<br/> AAGTACCGAACGACCGGCGAGCAGATG<br/> CCATCCATAGCCTCGTCTATGAAGCCAA<br/> CGCCCGAGAAAACGACCCAGTCAATGG<br/> GCGCCGGGACAACCTCGCCAGATGAT<br/> TGCTGAAGAGGAGCGCCTTCAAGTCCC<br/> GCACCAGGCTGATGGATGA</p>                                                                                                                                                                                                                                                                                                                   |
| XP_010034<br>810 | Egrandis_v1_0.<br>050484m.g | <i>EgLBD41</i> | <p>ATGAACTTCTCCTCCCCACGTCCCACCT<br/> CAGCATCGACAGCATCCTCCTCCTTC<br/> CCCCATAACCGCCGCCGCCGCCACC<br/> ACCACCTCGACTTCTCCTCCGCTCCAAGA<br/> GCAGCTCCACCACCCCGCCTGCGCCG<br/> CGTGCAAGTACCAGCGCCGAAATGCG<br/> AGCCCAACTGCCTCCTCGCCCCCTACTT<br/> CCCCTATGACCGCCAGCACCAGTTCCTC<br/> AACGCCACAAGCTCTTCGGCGTCAGC<br/> AACATCACCAAGGTCATCAAGAACCTC<br/> GCCCCGCACGAGAAGGACGAGGCCATG<br/> CGCACCATCATCTACCAGTCCGACGCC<br/> GCGCCACGACCCCGTCCTCGGGTGCTA<br/> CCGCATCATCCGCGACCTCCACCGCCAG<br/> ATCGAGTTCTGCCAGGCCGAGCTCGAGT<br/> TCGTCTCCGCCAGCTCGAGCTCTGCCG<br/> CGCCAGGCTCAGGCCAGCAGGAGGC<br/> CGCCATGCAGCAGATGATGGATCCCGGG<br/> GCGGCGGCGGGGGCTGGGGCGGGGCCG<br/> GTCGGCTGCGACATCGTGAGCCGGGGG<br/> GATCTGCTGGGGCAGGGGTACGGCTATG<br/> TCCAGCCGACCGCCGCCATCCGGGCC</p> |

|          |                             |                |                                                                                                                                                                                                                                                                                                                                                                                                                                                                                                                                                                                   |
|----------|-----------------------------|----------------|-----------------------------------------------------------------------------------------------------------------------------------------------------------------------------------------------------------------------------------------------------------------------------------------------------------------------------------------------------------------------------------------------------------------------------------------------------------------------------------------------------------------------------------------------------------------------------------|
|          |                             |                | AGGAAGTGGAAAGGTTATATCAGTAATGG<br>CCAGGACGGGAACGATCAGGCGTCCTT<br>GCAGGATTTTCGGTGCATGGGCCATGCAA<br>GTCTCCACGTTCCCGTCGGACTTTCAGA<br>TCAAGCAAGGCTTTGAAGGCGGATGTG<br>ATGATATGAGGCCATTATGGACATTGCA<br>GACGACAGGAACGATGGCCTCAATTTG<br>GAAGGCGAAATCATCGACGAGAGAAGG<br>TAA                                                                                                                                                                                                                                                                                                                 |
| KCW53955 | Eucgr.J03160.1              | <i>EgLBD42</i> | ATGGATCCGACAATATGTGCCGCGTGCA<br>AATATCTGAGAAGAAAATGCCCTCAAGA<br>TTGCATATTGGCTCCTTATTTCCCTCCT<br>CGAATCCACAAAGATTGCTTGTGTCCA<br>TAAGATCTTTGGTGCCAGCAACGTCACT<br>AAAATGCTTCAGCAAGTCCCGGGGCATT<br>TACGGGCGGAAGCAGCAGAGTGCATT<br>CATATGAAGCAACAGCCAGGGTTCAAG<br>ACCCTGTCTATGGATGCGTTGGAATCAT<br>CACTCAACTGCAACAACAAATCACGCA<br>GATTCACAGTGAGATAATGAAGATTAAG<br>GGTGAAATGGTTGCCCATCGATCTGCAC<br>ACCCACAACACCTTCCATCACCACAACC<br>ACAAGGTGAACCTTCCTGGTTCAGTTC<br>ACTCATCGACAGGAGCAGGACAACCTT<br>CAATCGGACAAGCATCTATCTGGAAACT<br>TCTAA                                                    |
| KX840006 | Egrandis_v1_0.<br>027428m.g | <i>EgLBD43</i> | ATGCATAGGCCGATCAACAATGGCATAG<br>GCGGCACGCACGCGGCCCTGCGCCTCGT<br>GCAAGCACCAAAGGAAGAAGTGTGACG<br>AAAAGTGCCTGCTGTCTCCTTACTTCCC<br>CGCGGAGAAATCCGTGGAATTCCAAGC<br>CGTGCACGGGGTGTACGGCGTCAGCAA<br>CGTGACCAAGATGGTGCTTGCCGTGCGC<br>GAGCAGGACCGGCGGTGGGTTGCCGAC<br>TCGCTCATCTGGGAGGCCAGGCACCGG<br>CAGCAGGACCCGGTCCACGGCGCGTTC<br>GGGGAGTACCAAAGGATACAAAACGAG<br>CTCCAATACTACAAGAGCTTGCTCCAGA<br>AGCAAGCGATCCAATCGCAACGCTTGC<br>AAGGGGAGATCAGCAAGAGAAGCCACA<br>GCATGGCGCGAAGCTTTGGCAGGTGGA<br>ACAACAAGTGCACGAACGCGATGGCGT<br>TCGACCCTGGGACGAGCATGAATACCGT<br>GGCGAGTTTCGCGGGAGGGATTGCTCAT |

|                  |                |                |                                                                                                                                                                                                                                                                                                                                                                                                                                                                                                                                                                                                                                                                                                                                                                                                                                                                                                                          |
|------------------|----------------|----------------|--------------------------------------------------------------------------------------------------------------------------------------------------------------------------------------------------------------------------------------------------------------------------------------------------------------------------------------------------------------------------------------------------------------------------------------------------------------------------------------------------------------------------------------------------------------------------------------------------------------------------------------------------------------------------------------------------------------------------------------------------------------------------------------------------------------------------------------------------------------------------------------------------------------------------|
|                  |                |                | GGCACCGCTATGAATAGTACCTACGCGC<br>GCGACAGCGGCAGCTGCACAATCGATT<br>CGATTCCATATCAGGGGCAGAGTTCAGA<br>AGATTTGAAACAAGAAAGAGAGATTGC<br>TTCTGGCCTCCCACTCCAACAAGAAGTT<br>ATTAATGAGTTTAATCAACACTACTTTCT<br>CTCAGGTAATTTATGCCGTCCGAGTTTTC<br>TATCAATTCGATTCCCCGATCGCGATAG                                                                                                                                                                                                                                                                                                                                                                                                                                                                                                                                                                                                                                                             |
| KCW47777         | Eucgr.K01522.1 | <i>EgLBD44</i> | ATGGACAGGATGCAAGGTGATCGGCGC<br>AGGGGCCGAGCACAGCCAGGCGTGCC<br>ATTCCCCGGGGGAATTGCCGGCTGAGG<br>AGATGACAGCGCCTCCTCCTGGGGCTCC<br>ATGTGGGGCGTGCAAGTTCTTGAGGAG<br>GAAGTGCATCCATGGGTGCATATTCGCG<br>CCCTATTTGGGTCAGATCAGGGTGCGG<br>CTAAATTCGCCGCCGTGCACATGGTGTT<br>TGGTGCAAGTAATGTGTCCAAGCTGCTC<br>CTTCACATTCCCGTCAACAAGAGGCAG<br>GATGCGGTGCGTACGATCACATATGAAG<br>CCCAGGCAAGGCTGGCAGATCCTGTTTA<br>TGGGTGCGTATCGACCATCCTTGCATTG<br>CAACAACAGGTGGCGACCCTCCAAGCG<br>GAGCTCTCGCTGGTGCAGACGCAGCTG<br>ATGAGCACCCGGTACGCGGTGGCGAGC<br>GCCTTCCAGGCCCGGAGATGCAGCAG<br>CCCCAGCCGGCGGCGCACCCCTTGCCAC<br>CTCCCCATGCTGCAGCCGGAGTACTTCA<br>ACAACCTCCTCCGCCACCTCCAACAACA<br>ACTTCATCAACATCAGCAGCTTCGCCGC<br>CGCCGCCGCCGCCGCCGCCGCCACCAA<br>CAACTTCGCCGCCGCCGCCGCCGCCGCGC<br>GTCCTCTCACACCCTGGAGCCGCTTCCC<br>CAGTTCCCGCACCCGCCAGGGACGAA<br>GACGAAGGAGAGGACGAAGCGGAGGA<br>GGAGGAGGAGGGGGGAAGCCACGTGC<br>CCGCCATTTTCGCGGACGAAATCTTCCG<br>CGGAAGGTGA |
| XP_010036<br>886 | Eucgr.K02222.1 | <i>EgLBD45</i> | ATGAAGGGTAGCTGCAATGGATGCCGA<br>GTGCTGAGGAAAGCTTGCGGCGACGAC<br>TGCCCCATCCGGCCTTGCCCTCACTGGA<br>TCAAGACCTCCCCCTCCAATCCAACGC<br>CACCTCTTCTCGCCAAGTTCTACGGC<br>CGCGCCGGCCTCCTCAACCTCCTCCTCT<br>CCGGCCCCGCCACCTCCGCCCTTCGAT                                                                                                                                                                                                                                                                                                                                                                                                                                                                                                                                                                                                                                                                                                   |

|                  |                |                |                                                                                                                                                                                                                                                                                                                                                                                                                                                                                                                                                                                                                                                                                                                                              |
|------------------|----------------|----------------|----------------------------------------------------------------------------------------------------------------------------------------------------------------------------------------------------------------------------------------------------------------------------------------------------------------------------------------------------------------------------------------------------------------------------------------------------------------------------------------------------------------------------------------------------------------------------------------------------------------------------------------------------------------------------------------------------------------------------------------------|
|                  |                |                | <p>CTTCAAGTCTCTGCTATACGAAGCGTGC<br/> GGGCGGATCGTTAACCCCATCTACGGCT<br/> CCGTCGGCTTGCTCTGGTCCGGCAGCTG<br/> GCACCTCTGCCAAGCCGCCGTCGACGC<br/> CGTCTCGCCGGCGACCCCATCGCGCGA<br/> GTCTCTCCGAGTCCGCCATCGGCTGCG<br/> CCACCCCGCCCCTCGAAGCCGGCGACA<br/> TCCGCCACGTGCCCAAGACAAAGCCCT<br/> CGGCGGCGCACCCCGATCAGCTCCGCA<br/> AGGTCAGGTCCC GCCGCCGCCGTTCA<br/> AGCGCTCGGCCCCGAAGACGAGGCACG<br/> AGGAAGCGGAGGAAGCTGGCGGAGAC<br/> GGAGCGGATAGCGACGAGCCTGCGAGC<br/> CGCGACTCGAGAGGGAGTCGGGGGTCG<br/> GCTGCTGACAGAGAGTTGGCGGAGGCG<br/> GAAGCCGGGGAGCGAGCCGCCGATGGT<br/> GACGACTCCGAGCTGGAGCTGACCTTG<br/> AGGTTGGAGCCGAGAAGAGCTAGAAGG<br/> GCTTCCGAGGAGCCACAAAGAGATCAG<br/> ATCACGGGCGTGTGCGACGGCGACACG<br/> CGCGTGCTGAGCTCTGGTCTGGACGTT<br/> GTCGGAGACTCTGA</p> |
| XP_010037<br>527 | Eucgr.K02809.1 | <i>EgLBD46</i> | <p>ATGTCTTCATCCAGTCTCTACA ACTCCC<br/> CCTGTGCTGCCTGCAAATTCCTGAGGAG<br/> GAAGTGCATGCCGGGATGCATATTCGCG<br/> CCCTACTTCCCCCAGAGGAGCCTCAGA<br/> AGTTCACCAATGTCCACAAGATCTTTGG<br/> TGCGAGCAATGTGACCAAGCTGTAAA<br/> CGAGCTCCCCCACACCAGAGAGAGGA<br/> TGCTGTGAACTCGCTAGCTTATGAGGCT<br/> GAGGCAAGGGTCCGTGACCCGGTCTAT<br/> GGCTGCGTCGGTGCCATCTCCTTCCTC<br/> AGAGGCAGGTCCAAAGGCTCCAGAAGG<br/> AGCTTGAAACGGCCAATGCCGATTCAT<br/> CCGATATGCCTGCAACGGGATTCCATCC<br/> TCAGCAGCCATTCCCGGGAGCAATAATC<br/> CAGTGCAACCTGTTACGCTACGCCAAAG<br/> GGCGGCTCCACTTGAGTTTGGTGGTGTT<br/> GGGAGGCCAATAGGCAATGAAGGAGGA<br/> GGGGCATTTTACCAAGCTCCTCTTCCTC<br/> CCTATCCATATCCTTATCCTCCTTCCAT<br/> GGAATGATAACTTTGGAGGGGACTTCAA<br/> TGGAGGAGGAGGAGGAGGCAGCATGTG<br/> A</p>     |



**Table S3** The information of *LBD* gene family in *Eucalyptus grandis*

| Gene name      | Genomic position         | ORF (bp) | Protein length (aa) | Mass(Da) | pI   | Localization |
|----------------|--------------------------|----------|---------------------|----------|------|--------------|
| <i>EgLBD1</i>  | Chr01:43293624..43294255 | 474      | 157                 | 17508.9  | 8.75 | Nuclear      |
| <i>EgLBD2</i>  | Chr02: 3746119..3747107  | 837      | 278                 | 24044.3  | 5.13 | Nuclear      |
| <i>EgLBD3</i>  | Chr02:23520442..23521264 | 711      | 236                 | 25813.7  | 5.95 | Nuclear      |
| <i>EgLBD4</i>  | Chr02:44694521..44696196 | 672      | 223                 | 24044.3  | 5.13 | Nuclear      |
| <i>EgLBD5</i>  | Chr02:50427154..50428075 | 789      | 262                 | 28818.6  | 8.93 | Nuclear      |
| <i>EgLBD6</i>  | Chr02:59086041..59086876 | 480      | 159                 | 17529.9  | 8.3  | Nuclear      |
| <i>EgLBD7</i>  | Chr02:59332685..59333586 | 774      | 257                 | 27838.5  | 9.02 | Nuclear      |
| <i>EgLBD8</i>  | Chr03:14232937..14233876 | 750      | 249                 | 28525.7  | 5.54 | Nuclear      |
| <i>EgLBD9</i>  | Chr03:14243456..14243806 | 363      | 120                 | 13989.1  | 9.66 | Nuclear      |
| <i>EgLBD10</i> | Chr03:39957609..39958253 | 645      | 214                 | 23499.4  | 8.25 | Nuclear      |
| <i>EgLBD11</i> | Chr03:61347354..61347959 | 606      | 201                 | 22821.8  | 6.1  | Nuclear      |
| <i>EgLBD12</i> | Chr04:38173475..38175872 | 747      | 248                 | 26191.9  | 7.02 | Nuclear      |
| <i>EgLBD13</i> | Chr05:14949609..14952874 | 735      | 244                 | 24872.2  | 7.6  | Nuclear      |
| <i>EgLBD14</i> | Chr05:14961547..14964939 | 714      | 237                 | 25414.6  | 8.58 | Nuclear      |
| <i>EgLBD15</i> | Chr05:27270334..27270612 | 213      | 70                  | 7648.8   | 8.36 | Nuclear      |
| <i>EgLBD16</i> | Chr05:27730568..27735405 | 381      | 126                 | 13951.8  | 6.72 | Nuclear      |
| <i>EgLBD17</i> | Chr05:27774155..27777868 | 516      | 171                 | 18645.1  | 8.67 | Nuclear      |
| <i>EgLBD18</i> | Chr05:34540619..34542263 | 594      | 197                 | 21597.5  | 5.57 | Nuclear      |
| <i>EgLBD19</i> | Chr05:75994147..75994410 | 381      | 126                 | 13951.8  | 6.72 | Nuclear      |
| <i>EgLBD20</i> | Chr06: 3586954..3587916  | 708      | 235                 | 24837.1  | 7.53 | Nuclear      |
| <i>EgLBD21</i> | Chr06:37052494..37053613 | 936      | 311                 | 33085.3  | 6.16 | Nuclear      |
| <i>EgLBD22</i> | Chr06:56812127..56814074 | 489      | 162                 | 17949.2  | 8.31 | Nuclear      |
| <i>EgLBD23</i> | Chr07:19430222..19431118 | 672      | 223                 | 24302.6  | 8.91 | Nuclear      |
| <i>EgLBD24</i> | Chr07:43909845..43910691 | 738      | 245                 | 26408.6  | 6.82 | Nuclear      |
| <i>EgLBD25</i> | Chr07:49099412..49101256 | 678      | 225                 | 24676.2  | 6.08 | Nuclear      |
| <i>EgLBD26</i> | Chr07:50719546..50720533 | 669      | 222                 | 24376.4  | 5.03 | Nuclear      |
| <i>EgLBD27</i> | Chr07:51949711..51950259 | 549      | 182                 | 20304.4  | 8.85 | Nuclear      |

| <b>Gene name</b> | <b>Genomic position</b>  | <b>ORF (bp)</b> | <b>Protein length (aa)</b> | <b>Mass(Da)</b> | <b>pI</b> | <b>Localization</b> |
|------------------|--------------------------|-----------------|----------------------------|-----------------|-----------|---------------------|
| <i>EgLBD28</i>   | Chr07:52024938..52026069 | 510             | 169                        | 18685.3         | 6.99      | Nuclear             |
| <i>EgLBD29</i>   | Chr07:52311083..52311790 | 672             | 223                        | 24165.5         | 9.01      | Nuclear             |
| <i>EgLBD30</i>   | Chr08:20732332..20733246 | 915             | 304                        | 33347.3         | 6.31      | Nuclear             |
| <i>EgLBD31</i>   | Chr08:20738526..20739410 | 885             | 294                        | 32355.5         | 6.38      | Nuclear             |
| <i>EgLBD32</i>   | Chr08:29295658..29296523 | 729             | 242                        | 25868.3         | 8.08      | Nuclear             |
| <i>EgLBD33</i>   | Chr09:27445609..27446136 | 528             | 175                        | 19096.2         | 6.41      | Nuclear             |
| <i>EgLBD34</i>   | Chr09:29046768..29047623 | 762             | 253                        | 28280.9         | 6.79      | Nuclear             |
| <i>EgLBD35</i>   | Chr10: 1610960..1611943  | 525             | 174                        | 18810.6         | 8.73      | Nuclear             |
| <i>EgLBD36</i>   | Chr10: 1872293..1873224  | 525             | 174                        | 19160.9         | 6.63      | Nuclear             |
| <i>EgLBD37</i>   | Chr10:12346751..12348072 | 687             | 228                        | 24932.5         | 5.93      | Nuclear             |
| <i>EgLBD38</i>   | Chr10:18643984..18645049 | 936             | 311                        | 33038.4         | 7.59      | Nuclear             |
| <i>EgLBD39</i>   | Chr10:27477243..27477770 | 528             | 175                        | 19452.7         | 6.19      | Nuclear             |
| <i>EgLBD40</i>   | Chr10:27603439..27603783 | 345             | 114                        | 13425.4         | 10.72     | Nuclear             |
| <i>EgLBD41</i>   | Chr10:33915425..33916255 | 831             | 276                        | 29931.3         | 5.15      | Nuclear             |
| <i>EgLBD42</i>   | Chr10:36998560..36999558 | 450             | 149                        | 16747.0         | 8.19      | Nuclear             |
| <i>EgLBD43</i>   | Chr11:13887164..13887880 | 717             | 238                        | 26791.1         | 9.1       | Nuclear             |
| <i>EgLBD44</i>   | Chr11:18632942..18633349 | 693             | 230                        | 24495.5         | 5.28      | Nuclear             |
| <i>EgLBD45</i>   | Chr11:30188061..30189201 | 780             | 259                        | 24992.5         | 9.52      | Nuclear             |
| <i>EgLBD46</i>   | Chr11:35443749..35444333 | 585             | 194                        | 20923.6         | 8.21      | Nuclear             |

**Table S4** Conserved motifs predicted by MEME program in EgLBD proteins.

| <b>Motif</b> | <b>Width</b> | <b>Best Possible Match</b>                                  | <b>Valid domain hit for architecture search</b> |
|--------------|--------------|-------------------------------------------------------------|-------------------------------------------------|
| 1            | 55           | KFANVHKVFGASNVTKMLNEVPEHQREDAVNSLVYEAN<br>ARIRDPVYGCVGHIWYL | DUF260<br>(domain of unknown function 260)      |
| 2            | 30           | TSSPCAACKFLRRKCWKDCIFAPYFPWDEP                              | DUF260<br>(domain of unknown function 260)      |
| 3            | 30           | QQQVQNLQKELAKAQAELMKYQCQHMNWPM                              | no hit                                          |
| 4            | 30           | NWHLCQAAVDTVLRGGPITMIAEEADAGGH                              | no hit                                          |
| 5            | 30           | MSCNGCRVLRKGCSESCILRPCLQWIDSPE                              | DUF260<br>(domain of unknown function 260)      |
| 6            | 30           | RERFDEIGKKIKREKDATHGDEMGRRHMMG                              | no hit                                          |
| 7            | 30           | PLKAYDIRHVPKTEGSAALHDIRRKRQRKR                              | no hit                                          |
| 8            | 30           | KWEIDCCEKQLED TNRRLSFLRQRDWELKR                             | no hit                                          |
| 9            | 40           | EIGLELTLGFKPVAREDHVIPVKKRRFEDCDEACKMELGL                    | no hit                                          |
| 10           | 30           | GIYNNNYDNNINPCLDEYNGFGSFWPLWT                               | no hit                                          |
| 11           | 30           | QSQLADKIAEVERLQVLLEAEKSNRSPSSW                              | no hit                                          |
| 12           | 30           | YDENC PGYYYYPWNPWNDGFGGDFDDGGG                              | no hit                                          |
| 13           | 32           | YNNPTNNVIPP GPASPSLALGSFDN PYHEQAH                          | no hit                                          |
| 14           | 41           | FDDITIDKEECDTESEFSFKDMRHSIEHAGRNDLKNAACF                    | no hit                                          |
| 15           | 31           | HQLAAIVAARERQEMIRVCEQQQIRRHHDQQ                             | no hit                                          |
| 16           | 36           | HCGNGGGV RGFDEQMDVNPKNVEDALWMNNQGLNY                        | no hit                                          |
| 17           | 30           | KPPGKRRGKRRRPTTNWMTSEETTTTAAW                               | no hit                                          |
| 18           | 30           | PGSSPSLFTTPGSTWIYGGISYETTSYHY                               | no hit                                          |
| 19           | 43           | IFSVETVEAEPEGPKRNRMLKFDWQGESEDRVGLLEGLGV                    | no hit                                          |
| 20           | 33           | WAAWMVPRRTIDFRQFEGGCGGGGT MVEGEGDL                          | no hit                                          |

**Table S5** Protein-protein interaction prediction for possible functional protein association networks of EgLBD22.

| Predicted Functional Partners | <i>Eucalyptus grandis</i> Homologous Gene | Partner annotation                                                                                                                                                                                          | score |
|-------------------------------|-------------------------------------------|-------------------------------------------------------------------------------------------------------------------------------------------------------------------------------------------------------------|-------|
| EXPA14                        | Eucgr.G02490                              | expansin A14; Causes loosening and extension of plant cell walls by disrupting non-covalent bonding between cellulose microfibrils and matrix glucans. No enzymatic activity has been found (By similarity) | 0.730 |
| LBD13                         | Eucgr.G03121                              | LOB domain-containing protein 13                                                                                                                                                                            | 0.733 |

**Table S6** Protein-protein interaction prediction for possible functional protein association networks of EgLBD29.

| Predicted Functional Partners | <i>Eucalyptus grandis</i> Homologous Gene | Partner annotation                                                                                                                                                                                                                                                                                                                                                                                                                                         | score |
|-------------------------------|-------------------------------------------|------------------------------------------------------------------------------------------------------------------------------------------------------------------------------------------------------------------------------------------------------------------------------------------------------------------------------------------------------------------------------------------------------------------------------------------------------------|-------|
| F3F9.16                       | Eucgr.B00034                              | general regulatory factor 2; Is associated with a DNA binding complex that binds to the G box, a well-characterized cis-acting DNA regulatory element found in plant genes (259 aa)                                                                                                                                                                                                                                                                        | 0.678 |
| AT5G26330                     | Eucgr.H03540                              | plastocyanin-like domain-containing protein / putative mavicyanin (187 aa)                                                                                                                                                                                                                                                                                                                                                                                 | 0.629 |
| AT1G54790                     | Eucgr.H04457                              | GDSL esterase/lipase (408 aa)                                                                                                                                                                                                                                                                                                                                                                                                                              | 0.628 |
| AT1G14240                     | Eucgr.G02502                              | GDA1/CD39 nucleoside phosphatase family protein; Catalyzes the hydrolysis of phosphoanhydride bonds of nucleoside tri- and di-phosphates (By similarity) (483 aa)                                                                                                                                                                                                                                                                                          | 0.627 |
| AT5G07310                     | Eucgr.B03559                              | ethylene-responsive transcription factor ERF115; Probably acts as a transcriptional activator. Binds to the GCC-box pathogenesis-related promoter element. May be involved in the regulation of gene expression by stress factors and by components of stress signal transduction pathways (By similarity) (263 aa)                                                                                                                                        | 0.625 |
| AT3G52900                     | Eucgr.B03885                              | uncharacterized protein (164 aa)                                                                                                                                                                                                                                                                                                                                                                                                                           | 0.591 |
| AT3G10590                     | Eucgr.G02591                              | SANT DNA-binding domain-containing protein (206 aa)                                                                                                                                                                                                                                                                                                                                                                                                        | 0.588 |
| DSEL                          | Eucgr.E02710                              | lipase class 3 family protein; Acylhydrolase that catalyzes the hydrolysis of 1,3-diacylglycerol (1,3-DAG) and 1-monoacylglycerol (1-MAG) at the sn- 1 position. High activity toward 1,3-DAG and 1-MAG, but low activity toward 1,2-diacylglycerol (1,2-DAG) and 1-lysophosphatidylcholine (1-LPC), and no activity toward phosphatidylcholine (PC), monogalactosyldiacylglycerol (MGDG), digalactosyldiacylglycerol (DGDG), triacylglycerol (TAG) and 2- | 0.579 |

|           |              |                                                                                                                                                                       |       |
|-----------|--------------|-----------------------------------------------------------------------------------------------------------------------------------------------------------------------|-------|
|           |              | monoacylglycerol (2-MAG). May be involved in the negative regulation of seedling establishment by inhibiting the breakdown, beta-oxidation and mobi [...]<br>(419 aa) |       |
| AT1G70500 | Eucgr.H02555 | pectin lyase-like protein (468 aa)                                                                                                                                    | 0.579 |
| RNS3      | Eucgr.G02497 | ribonuclease 3; May remobilize phosphate, particularly when cells senesce or when phosphate becomes limiting (222 aa)                                                 | 0.578 |

**Table S7** Protein-protein interaction prediction for possible functional protein association networks of EgLBD37.

| Predicted Functional Partners | <i>Eucalyptus grandis</i> Homologous Gene | Partner annotation                                                                                                                                                                                                                                                                                                                                                                                                                                                | score |
|-------------------------------|-------------------------------------------|-------------------------------------------------------------------------------------------------------------------------------------------------------------------------------------------------------------------------------------------------------------------------------------------------------------------------------------------------------------------------------------------------------------------------------------------------------------------|-------|
| DFO                           | Eucgr.B03990                              | DSB formation (233 aa)                                                                                                                                                                                                                                                                                                                                                                                                                                            | 0.598 |
| SEU                           | Eucgr.F04275                              | seuss; DNA-binding adapter subunit of the SEU-LUG transcriptional corepressor of the C class floral homeotic gene AGAMOUS during the early stages of floral meristem development. Is part of the A class cadastral complex that define the boundaries between the A and C class homeotic genes expression and function. Interacts together with APETALA2 and LEUNIG to repress AGAMOUS expression (877 aa)                                                        | 0.544 |
| AT5G61820                     | Eucgr.K02186                              | uncharacterized protein (475 aa)                                                                                                                                                                                                                                                                                                                                                                                                                                  | 0.436 |
| LUG                           | Eucgr.C02838                              | LEUNIG; Transcription repressor subunit of the SEU-LUG transcriptional corepressor of the C class floral homeotic gene AGAMOUS during the early stages of floral meristem development. Is part of the A class cadastral complex that define the boundaries between the A and C class homeotic genes expression and function. Interacts together with APETALA2 and SEUSS to repress AGAMOUS expression. Also plays a role in ovule and pollen development (969 aa) | 0.412 |
